# Supplementary material
Source: PubMed Central journal article supplement (PMC9547941)

# Supporting Information

for

## Neuroprotective Effects of $\sigma_2$ R/TMEM97 Receptor Modulators in Neuronal Model of Huntington's Disease

Jing Jin<sup>1\*</sup>, Nicolas Arbez<sup>1,5\*</sup>, James J. Sahn<sup>2\*</sup>, Yan Lu<sup>2\*</sup>, Kathryn T. Linkens<sup>2</sup>, Timothy R. Hodges<sup>2</sup>, Anthony Tang<sup>1</sup>, Robyn Wiseman<sup>1,4</sup>, Stephen F. Martin<sup>2\*\*</sup> and Christopher A. Ross<sup>1,3\*\*</sup>

<sup>1</sup>Division of Neurobiology, Department of Psychiatry, Johns Hopkins University School of Medicine, Baltimore Maryland, 21287, United States.

<sup>2</sup>Department of Chemistry, The University of Texas at Austin, Austin, TX, 78712, United States

<sup>3</sup>Departments of Neurology, Neuroscience and Pharmacology, Johns Hopkins University School of Medicine, Baltimore, Maryland, 21287, United States.

<sup>4</sup>Department of Pharmacology and Molecular Sciences, Johns Hopkins University School of Medicine, Baltimore, Maryland, 21287, United States.

<sup>5</sup>Cellular Sciences Department, IdRS, Croissy-sur-Seine, France

## Table of Contents

|                                                                     |     |
|---------------------------------------------------------------------|-----|
| 1. Table of $\sigma_2$ R/TMEM97 and $\sigma_1$ R binding affinities | S3  |
| 2. Tables of binding profiles at non-sigma receptor sites           | S4  |
| 3. Supplementary Figures                                            | S10 |
| 4. Copies of NMR Spectra                                            | S11 |

| <b>Table S1.</b> $\sigma_2$ R/TMEM97 and $\sigma_1$ R binding affinities. <sup>a</sup> |                                                   |                                                      |                                             |                                                |                                                   |                                                      |                                            |                                               |
|----------------------------------------------------------------------------------------|---------------------------------------------------|------------------------------------------------------|---------------------------------------------|------------------------------------------------|---------------------------------------------------|------------------------------------------------------|--------------------------------------------|-----------------------------------------------|
| <b>Compound number</b>                                                                 | $K_i$ (nM)<br>$\sigma_2$ R/TMEM97(r) <sup>b</sup> | $pK_i \pm SD$<br>$\sigma_2$ R/TMEM97(r) <sup>b</sup> | $K_i$ (nM)<br>$\sigma_1$ R(gp) <sup>b</sup> | $pK_i \pm SD$<br>$\sigma_1$ R(gp) <sup>b</sup> | $K_i$ (nM)<br>$\sigma_2$ R/TMEM97(h) <sup>c</sup> | $pK_i \pm SD$<br>$\sigma_2$ R/TMEM97(h) <sup>c</sup> | $K_i$ (nM)<br>$\sigma_1$ R(h) <sup>c</sup> | $pK_i \pm SD$<br>$\sigma_1$ R(h) <sup>c</sup> |
| <b>DKR-1051</b>                                                                        | 61                                                | 7.23 ± 0.09                                          | 556                                         | 6.25 ± 0.07                                    |                                                   |                                                      |                                            |                                               |
| <b>UKH-1114</b>                                                                        | 46                                                | 7.3±0.2                                              | 1279                                        | 5.9±0.15                                       | 110.6                                             | 6.96±0.59                                            |                                            |                                               |
| <b>AMA-1127</b>                                                                        | 11                                                | 8.0±0.1                                              | 207                                         | 6.68±0.08                                      |                                                   |                                                      |                                            |                                               |
| <b>DKR-1677</b>                                                                        | 5.1                                               | 8.3±0.1                                              | 230                                         | 6.64±0.06                                      | 11                                                | 7.99±0.09                                            | 31                                         | 7.52±0.08                                     |
| <b>JJS-1678</b>                                                                        |                                                   |                                                      |                                             |                                                | 3.3                                               | 8.58±0.09                                            | 106                                        | 7.08±0.12                                     |
| <b>BJM-1679</b>                                                                        |                                                   |                                                      |                                             |                                                | 5.5                                               | 8.26±0.22                                            | 624                                        | 6.21±0.07                                     |
| <b>EES-1686</b>                                                                        |                                                   |                                                      |                                             |                                                | 6.0                                               | 8.34±0.18                                            | 97                                         | 7.03±0.08                                     |
| <b>BEA-1687</b>                                                                        |                                                   |                                                      |                                             |                                                | 26                                                | 7.6±0.1                                              | 185                                        | 6.7±0.1                                       |
| <b>MPC-1154</b>                                                                        | 166                                               | 6.8±0.1                                              | 5.9                                         | 8.23±0.06                                      |                                                   |                                                      |                                            |                                               |
| <b>HLJ-1560</b>                                                                        | 116                                               | 6.94±0.12                                            | 12                                          | 7.9±0.07                                       |                                                   |                                                      |                                            |                                               |

<sup>a</sup>  $K_i$  values determined from average  $pK_i$  obtained from non-linear regression of radioligand competition binding isotherms run at least in triplicate by PDSP. <sup>b</sup>  $\sigma_2$ R/TMEM97 was sourced from rat PC12 cells and  $\sigma_1$ R was sourced from guinea pig brain. <sup>c</sup>  $\sigma_2$ R/TMEM97 and  $\sigma_1$ R were sourced from HEK293T transfected with human  $\sigma_1$ R and  $\sigma_2$ R/TMEM97.

**Table S2. DKR-1051 binding profile at non-sigma receptor sites.<sup>a</sup>**

| <b>Target</b>       | <b><i>K<sub>i</sub></i> (nM)</b> | <b>Target</b>   | <b><i>K<sub>i</sub></i> (nM)</b> |
|---------------------|----------------------------------|-----------------|----------------------------------|
| 5HT <sub>1A</sub>   | *                                | Beta2           | *                                |
| 5HT <sub>1B</sub>   | *                                | Beta3           | *                                |
| 5HT <sub>1D</sub>   | *                                | BZP Rat Brain   | *                                |
| 5HT <sub>1e</sub>   | *                                | Calcium Channel | *                                |
| 5HT <sub>2A</sub>   | *                                | D <sub>1</sub>  | *                                |
| 5HT <sub>2B</sub>   | 2902*                            | D <sub>2</sub>  | *                                |
| 5HT <sub>2C</sub>   | *                                | D <sub>3</sub>  | *                                |
| 5HT <sub>3</sub>    | *                                | D <sub>4</sub>  | *                                |
| 5HT <sub>5a</sub>   | *                                | D <sub>5</sub>  | *                                |
| 5HT <sub>6</sub>    | *                                | DAT             | 1264                             |
| 5HT <sub>7</sub>    | *                                | DOR             | *                                |
| A2B2                | *                                | GabaA           | *                                |
| A2B4                | *                                | H <sub>1</sub>  | 1676                             |
| A3B2                | *                                | H <sub>3</sub>  | *                                |
| A3B4                | 5202                             | KOR             | 331                              |
| A4B2                | *                                | M <sub>1</sub>  | *                                |
| A4B2**              | *                                | M <sub>2</sub>  | *                                |
| A4B4                | >10,000                          | M <sub>3</sub>  | *                                |
| A7                  | >10,000                          | M <sub>4</sub>  | *                                |
| A7**                | *                                | M <sub>5</sub>  | *                                |
| Alpha <sub>1a</sub> | *                                | MOR             | 881                              |
| Alpha <sub>1b</sub> | *                                | NET             | 301                              |
| Alpha <sub>1d</sub> | *                                | NMDA            | *                                |
| Alpha <sub>2a</sub> | *                                | PBR             | *                                |
| Alpha <sub>2b</sub> | 2307                             | SERT            | *                                |
| Alpha <sub>2c</sub> | *                                | V1A             | *                                |
| AMPA                | *                                | V1B             | *                                |
| Beta1               | *                                | V2              | *                                |

\* < 50% inhibition of radioligand binding at 10  $\mu$ M.

\*\* sourced from rodent brain

<sup>a</sup> Receptor binding assays were performed by the Psychoactive Drug Screening Program (PDSP) at Chapel Hill, North Carolina.

**Table S3. UKH-1114 binding profile at non-sigma receptor sites.<sup>a</sup>**

| <b>Target</b>       | <b><i>K<sub>i</sub></i> (nM)</b> | <b>Target</b>   | <b><i>K<sub>i</sub></i> (nM)</b> |
|---------------------|----------------------------------|-----------------|----------------------------------|
| 5HT <sub>1A</sub>   | *                                | <b>Beta3</b>    | *                                |
| 5HT <sub>1B</sub>   | *                                | BZP Rat Brain   | *                                |
| 5HT <sub>1D</sub>   | *                                | Calcium Channel | >10,000                          |
| 5HT <sub>1e</sub>   | *                                | D <sub>1</sub>  | *                                |
| 5HT <sub>2A</sub>   | *                                | D <sub>2</sub>  | *                                |
| 5HT <sub>2B</sub>   | *                                | D <sub>3</sub>  | *                                |
| 5HT <sub>2C</sub>   | *                                | D <sub>4</sub>  | *                                |
| 5HT <sub>3</sub>    | *                                | D <sub>5</sub>  | *                                |
| 5HT <sub>5a</sub>   | *                                | DAT             | *                                |
| 5HT <sub>6</sub>    | *                                | DOR             | *                                |
| 5HT <sub>7</sub>    | *                                | GabaA           | *                                |
| A2B2                | *                                | H <sub>1</sub>  | *                                |
| A2B4                | *                                | H <sub>3</sub>  | *                                |
| A3B2                | *                                | hERG            | 549                              |
| A3B4                | *                                | KOR             | 1383                             |
| A4B2                | *                                | M <sub>1</sub>  | *                                |
| A4B2**              | *                                | M <sub>2</sub>  | *                                |
| A4B4                | *                                | M <sub>3</sub>  | *                                |
| A7                  | *                                | M <sub>4</sub>  | *                                |
| A7**                | *                                | M <sub>5</sub>  | *                                |
| Alpha <sub>1a</sub> | *                                | MOR             | *                                |
| Alpha <sub>1b</sub> | *                                | NET             | 1,046                            |
| Alpha <sub>1d</sub> | *                                | NMDA            | 6,724                            |
| Alpha <sub>2a</sub> | *                                | PBR             | *                                |
| Alpha <sub>2b</sub> | *                                | SERT            | *                                |
| Alpha <sub>2c</sub> | *                                | V1A             | >10,000                          |
| AMPA                | >10,000                          | V1B             | >10,000                          |
| Beta1               | *                                | V2              | >10,000                          |
| Beta2               | *                                |                 |                                  |

\* < 50% inhibition of radioligand binding at 10 μM.

\*\* sourced from rodent brain

<sup>a</sup> Receptor binding assays were performed by the Psychoactive Drug Screening Program (PDSP) at Chapel Hill, North Carolina.

**Table S4. AMA-1127 binding profile at non-sigma receptor sites.<sup>a</sup>**

| <b>Target</b>       | <b><i>K<sub>i</sub></i> (nM)</b> | <b>Target</b>  | <b><i>K<sub>i</sub></i> (nM)</b> |
|---------------------|----------------------------------|----------------|----------------------------------|
| 5HT <sub>1A</sub>   | 38                               | BZP Rat Brain  | *                                |
| 5HT <sub>1B</sub>   | *                                | D <sub>2</sub> | *                                |
| 5HT <sub>1D</sub>   | 1492                             | D <sub>3</sub> | 670                              |
| 5HT <sub>1e</sub>   | 1204                             | D <sub>4</sub> | 568                              |
| 5HT <sub>2A</sub>   | 719                              | DAT            | 906                              |
| 5HT <sub>2B</sub>   | 819                              | DOR            | *                                |
| 5HT <sub>2C</sub>   | 460                              | GabaA          | *                                |
| 5HT <sub>3</sub>    | 741                              | H <sub>2</sub> | 456                              |
| 5HT <sub>5a</sub>   | *                                | H <sub>4</sub> | *                                |
| 5HT <sub>6</sub>    | *                                | KOR            | *                                |
| 5HT <sub>7</sub>    | 441                              | M <sub>4</sub> | *                                |
| Alpha <sub>1a</sub> | *                                | M <sub>5</sub> | *                                |
| Alpha <sub>1b</sub> | *                                | MOR            | *                                |
| Alpha <sub>1d</sub> | 3241                             | NET            | 165                              |
| Alpha <sub>2a</sub> | 194                              |                |                                  |
| Alpha <sub>2b</sub> | 1818                             | PBR            | *                                |
| Alpha <sub>2c</sub> | 5756                             | SERT           | *                                |
| Beta1               | *                                |                |                                  |
| Beta2               | *                                |                |                                  |
| Beta3               | *                                |                |                                  |
|                     |                                  |                |                                  |
|                     |                                  |                |                                  |

\* <50% inhibition of radioligand binding at 10 μM.

\*\* sourced from rodent brain

<sup>a</sup> Receptor binding assays were performed by the Psychoactive Drug Screening Program (PDSP) at Chapel Hill, North Carolina.

**Table S5. BJM-1679 binding profile at non-sigma receptor sites.<sup>a</sup>**

| <b>Target</b>       | <b><i>K<sub>i</sub></i> (nM)</b> | <b>Target</b>  | <b><i>K<sub>i</sub></i> (nM)</b> |
|---------------------|----------------------------------|----------------|----------------------------------|
| 5HT <sub>1A</sub>   | *                                | D <sub>1</sub> | *                                |
| 5HT <sub>1B</sub>   | *                                | D <sub>2</sub> | *                                |
| 5HT <sub>1D</sub>   | *                                | D <sub>3</sub> | 740                              |
| 5HT <sub>1e</sub>   | *                                | D <sub>4</sub> | *                                |
| 5HT <sub>2A</sub>   | 2042                             | D <sub>5</sub> | *                                |
| 5HT <sub>2B</sub>   | 1703                             | DAT            | 488                              |
| 5HT <sub>2C</sub>   | 232                              | DOR            | *                                |
| 5HT <sub>3</sub>    | *                                | GabaA          | *                                |
| 5HT <sub>5a</sub>   | *                                | H <sub>1</sub> | *                                |
| 5HT <sub>6</sub>    | 2286                             | H <sub>2</sub> | *                                |
| 5HT <sub>7A</sub>   | *                                | H <sub>3</sub> | 2217                             |
| Alpha <sub>1a</sub> | *                                | H <sub>4</sub> |                                  |
| Alpha <sub>1b</sub> | *                                | KOR            | *                                |
| Alpha <sub>1d</sub> | *                                | M <sub>1</sub> | 1438                             |
| Alpha <sub>2a</sub> | 2123                             | M <sub>2</sub> | *                                |
| Alpha <sub>2b</sub> | *                                | M <sub>3</sub> | *                                |
| Alpha <sub>2c</sub> | *                                | M <sub>4</sub> | *                                |
| Beta <sub>1</sub>   | *                                | M <sub>5</sub> | 787                              |
| Beta <sub>2</sub>   | *                                | MOR            | *                                |
| Beta <sub>3</sub>   | *                                | NET            | 263                              |
| BZP Rat Brain       | *                                | PBR            | *                                |
|                     |                                  | SERT           | 1823                             |
|                     |                                  |                |                                  |

\* < 50% inhibition of radioligand binding at 10  $\mu$ M.

\*\* sourced from rodent brain

<sup>a</sup> Receptor binding assays were performed by the Psychoactive Drug Screening Program (PDSP) at Chapel Hill, North Carolina.

**Table S6. EES-1686 binding profile at non-sigma receptor sites.<sup>a</sup>**

| <b>Target</b>       | <b><i>K<sub>i</sub></i> (nM)</b> | <b>Target</b>  | <b><i>K<sub>i</sub></i> (nM)</b> |
|---------------------|----------------------------------|----------------|----------------------------------|
| 5HT <sub>1A</sub>   | *                                | D <sub>1</sub> | *                                |
| 5HT <sub>1B</sub>   | *                                | D <sub>2</sub> | *                                |
| 5HT <sub>1D</sub>   | *                                | D <sub>3</sub> | 991                              |
| 5HT <sub>1E</sub>   | *                                | D <sub>4</sub> | *                                |
| 5HT <sub>2A</sub>   | 2166                             | D <sub>5</sub> | 944                              |
| 5HT <sub>2B</sub>   | *                                | DAT            | *                                |
| 5HT <sub>2C</sub>   | 201                              | DOR            | *                                |
| 5HT <sub>3</sub>    | *                                | GabaA          | *                                |
| 5HT <sub>5a</sub>   | *                                | H <sub>1</sub> | *                                |
| 5HT <sub>6</sub>    | 3918                             | H <sub>2</sub> | 2248                             |
| 5HT <sub>7A</sub>   | *                                | H <sub>3</sub> | 2484                             |
| Alpha <sub>1a</sub> | *                                | H <sub>4</sub> |                                  |
| Alpha <sub>1b</sub> | 3837                             | KOR            | *                                |
| Alpha <sub>1d</sub> | *                                | M <sub>1</sub> | *                                |
| Alpha <sub>2a</sub> | 8220                             | M <sub>2</sub> | *                                |
| Alpha <sub>2b</sub> | *                                | M <sub>3</sub> | *                                |
| Alpha <sub>2c</sub> | *                                | M <sub>4</sub> | *                                |
| Beta1               | *                                | M <sub>5</sub> | 2254                             |
| Beta2               | *                                | MOR            | *                                |
| Beta3               | *                                | NET            | 421                              |
| BZP Rat Brain       | *                                | PBR            | *                                |
|                     |                                  | SERT           | *                                |

\* < 50% inhibition of radioligand binding at 10  $\mu$ M.

\*\* sourced from rodent brain

<sup>a</sup> Receptor binding assays were performed by the Psychoactive Drug Screening Program (PDSP) at Chapel Hill, North Carolina.



**Table S7. BEA-1687 binding profile at non-sigma receptor sites.<sup>a</sup>**

| <b>Target</b>       | <b><i>K<sub>i</sub></i> (nM)</b> | <b>Target</b>  | <b><i>K<sub>i</sub></i> (nM)</b> |
|---------------------|----------------------------------|----------------|----------------------------------|
| 5HT <sub>1A</sub>   | *                                | D <sub>1</sub> | *                                |
| 5HT <sub>1B</sub>   | *                                | D <sub>2</sub> | *                                |
| 5HT <sub>1D</sub>   | 1522                             | D <sub>3</sub> | *                                |
| 5HT <sub>1E</sub>   | *                                | D <sub>4</sub> | 525                              |
| 5HT <sub>2A</sub>   | *                                | D <sub>5</sub> | *                                |
| 5HT <sub>2B</sub>   | *                                | DAT            | *                                |
| 5HT <sub>2C</sub>   | 2165                             | DOR            | *                                |
| 5HT <sub>3</sub>    | *                                | GabaA          | *                                |
| 5HT <sub>5A</sub>   | *                                | H <sub>1</sub> | *                                |
| 5HT <sub>6</sub>    | *                                | H <sub>2</sub> | *                                |
| 5HT <sub>7A</sub>   | *                                | H <sub>3</sub> | *                                |
| Alpha <sub>1a</sub> | *                                | H <sub>4</sub> | *                                |
| Alpha <sub>1b</sub> | *                                |                |                                  |
| Alpha <sub>1d</sub> | 3044                             | KOR            | *                                |
| Alpha <sub>2a</sub> | *                                | M <sub>1</sub> | *                                |
| Alpha <sub>2b</sub> | *                                | M <sub>2</sub> | *                                |
| Alpha <sub>2c</sub> | *                                | M <sub>3</sub> | *                                |
| AMPA                | *                                | M <sub>4</sub> | *                                |
| Beta <sub>1</sub>   | *                                | M <sub>5</sub> | *                                |
| Beta <sub>2</sub>   | *                                | MOR            | *                                |
| Beta <sub>3</sub>   | *                                | NET            | *                                |
| BZP Rat Brain       | *                                | NMDA           | *                                |
|                     |                                  | PBR            | *                                |
|                     |                                  | SERT           | *                                |

\* < 50% inhibition of radioligand binding at 10 μM.

\*\* sourced from rodent brain

<sup>a</sup> Receptor binding assays were performed by the Psychoactive Drug Screening Program (PDSP) at Chapel Hill, North Carolina.

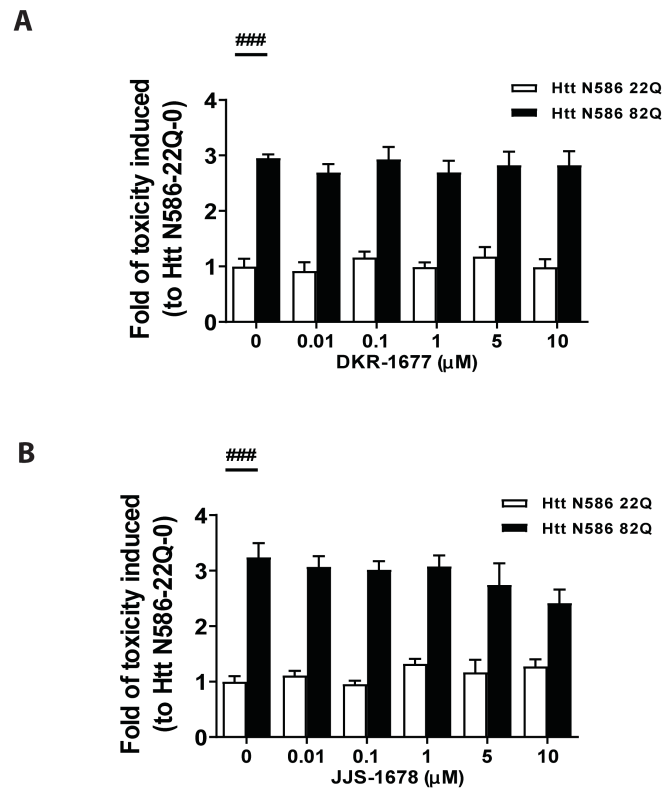

**Figure S1.  $\sigma_2\text{R}/\text{TMEM97}$ -selective modulators did not show protective effect on mHTT induced toxicity.**  $\sigma_2\text{R}/\text{TMEM97}$ -selective modulators, **DKR-1677 (A)** and **JJS-1678 (B)** had no effect on mHTT induced cell toxicity. <sup>###</sup>  $p < 0.001$  vs Htt N586-22Q.

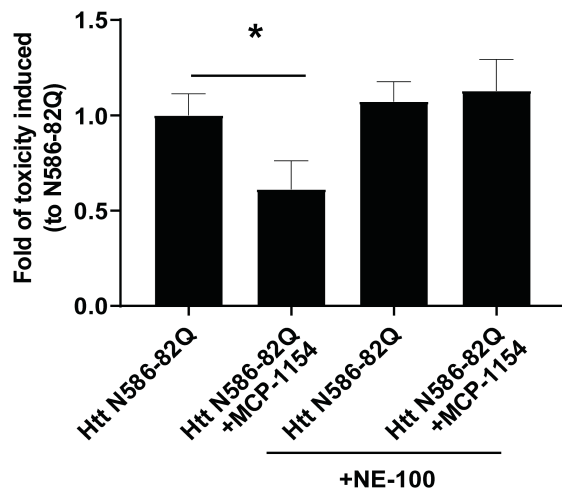

**Figure S2. Specificity of MCP-1154.** NE-100 was used in the primary cortical neurons treated  $\sigma_1\text{R}$  modulator, **MCP-1154**. Primary cortical neurons were co-transfected with Htt N586-82Q and GFP. Four hours after transfection, neurons were treated with modulators with or without a pretreatment with  $1 \mu\text{M}$  of NE-100. Forty-eight hours later, neurons were fixed and nuclei were stained. The protective effect of **MCP-1154** was blocked by NE-100. \*  $p < 0,05$  vs Htt N586 82Q.  $n = 3$ .

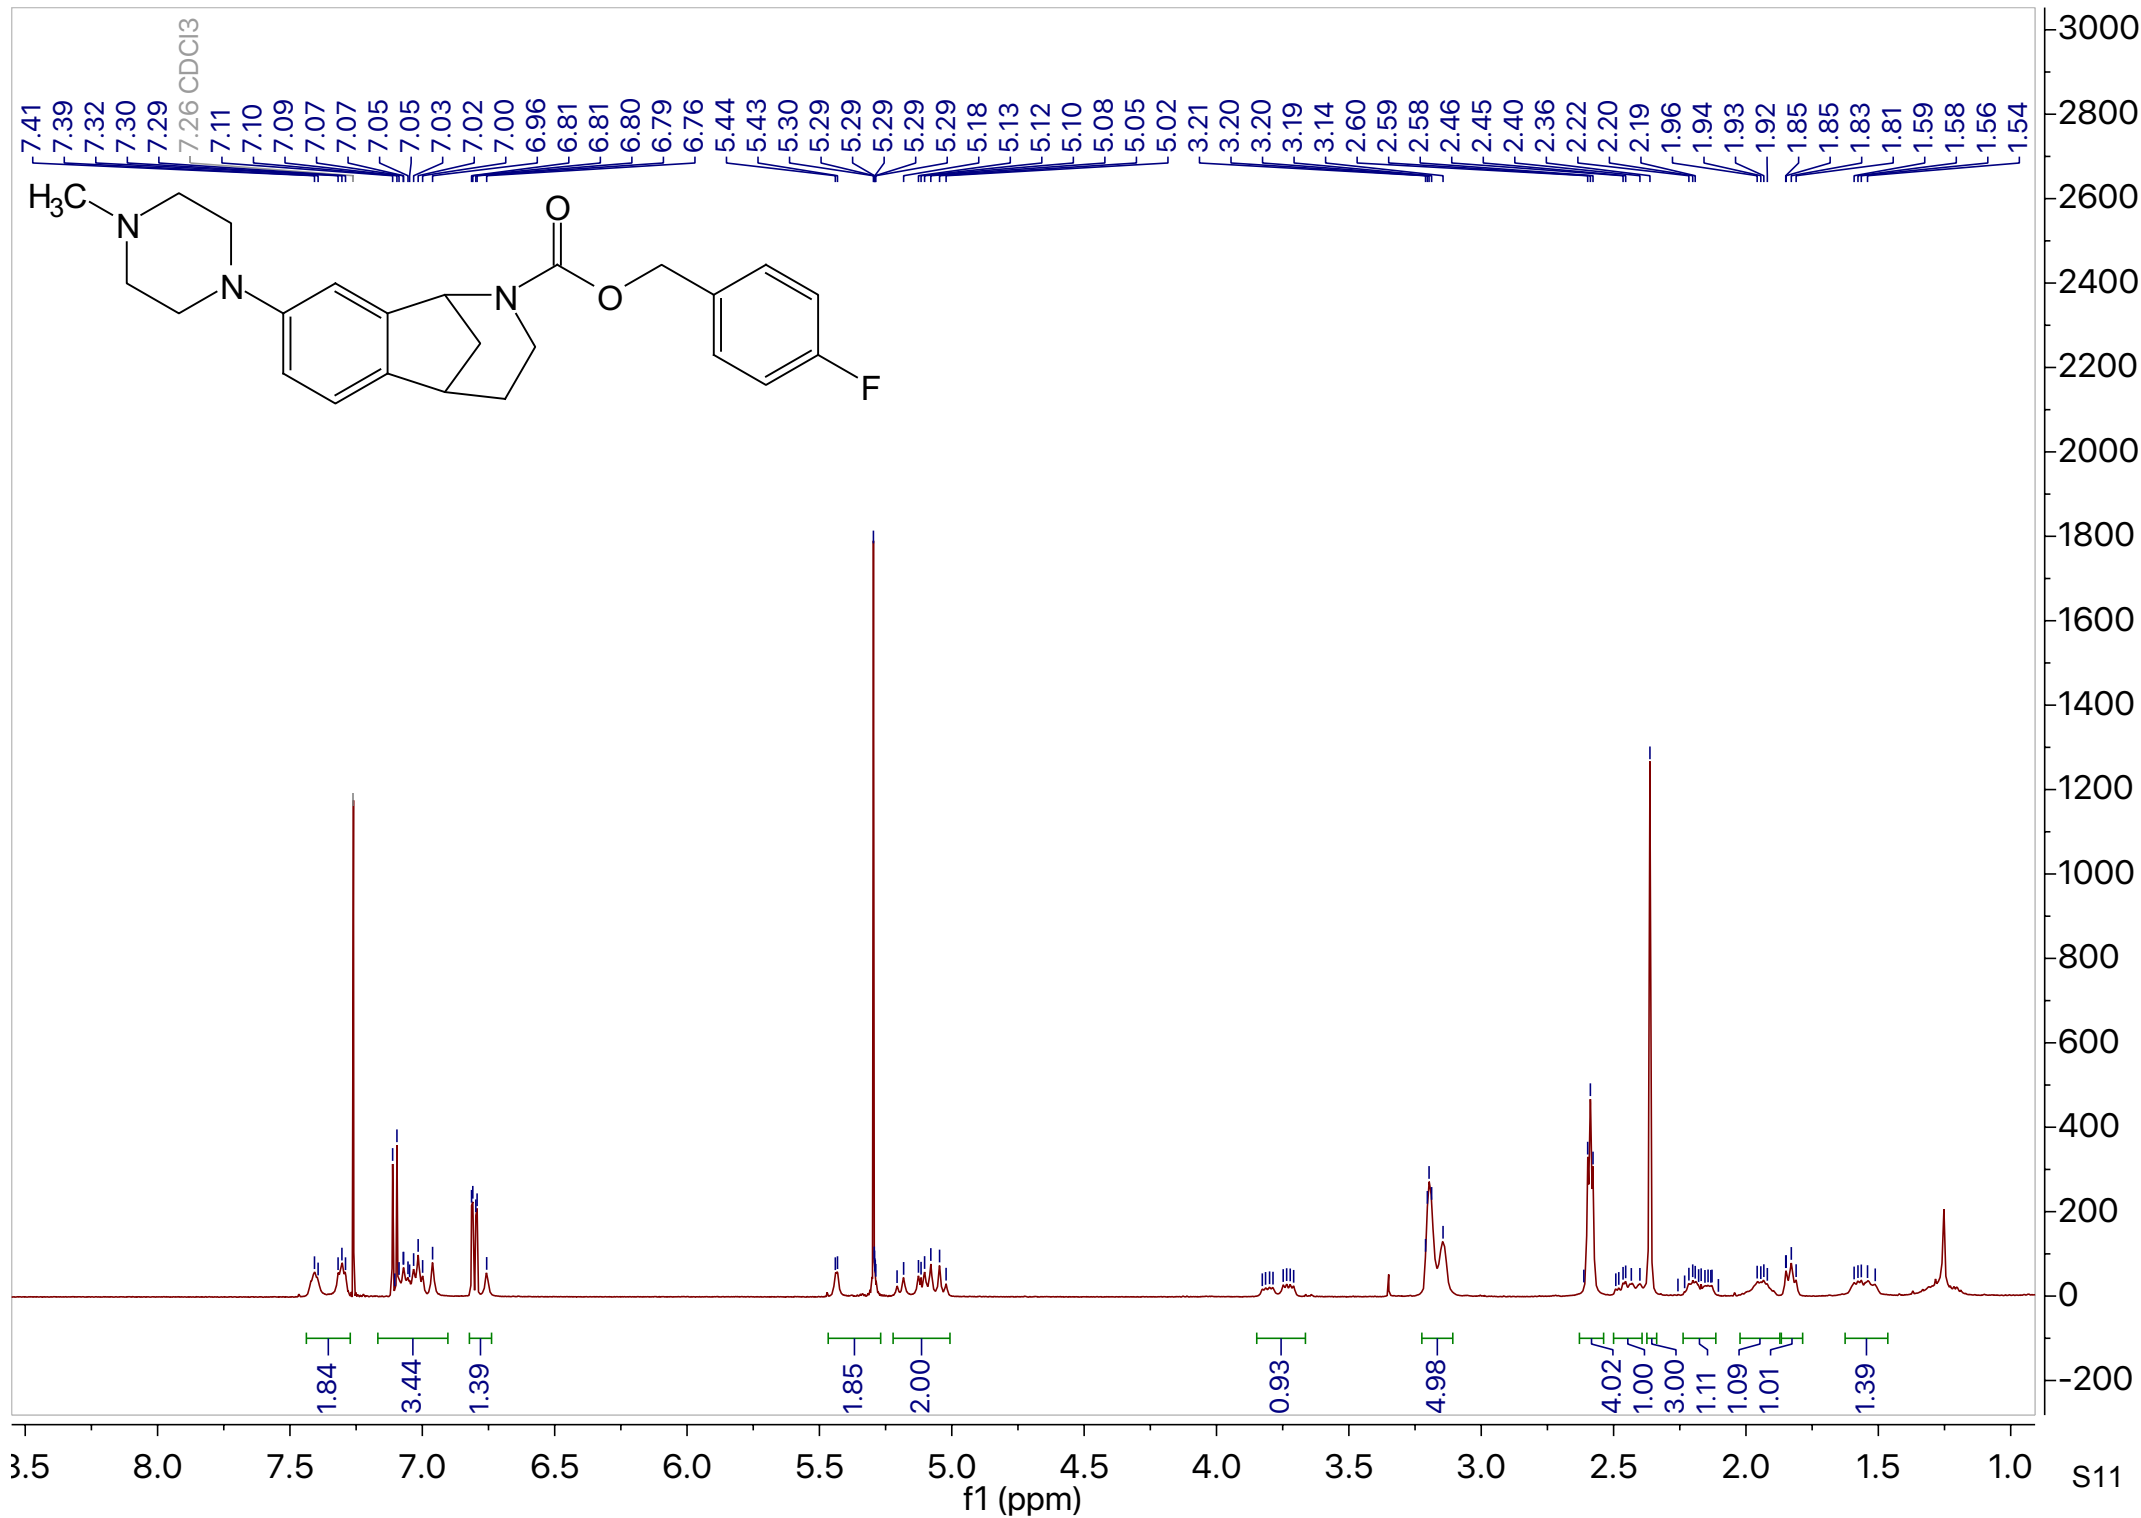

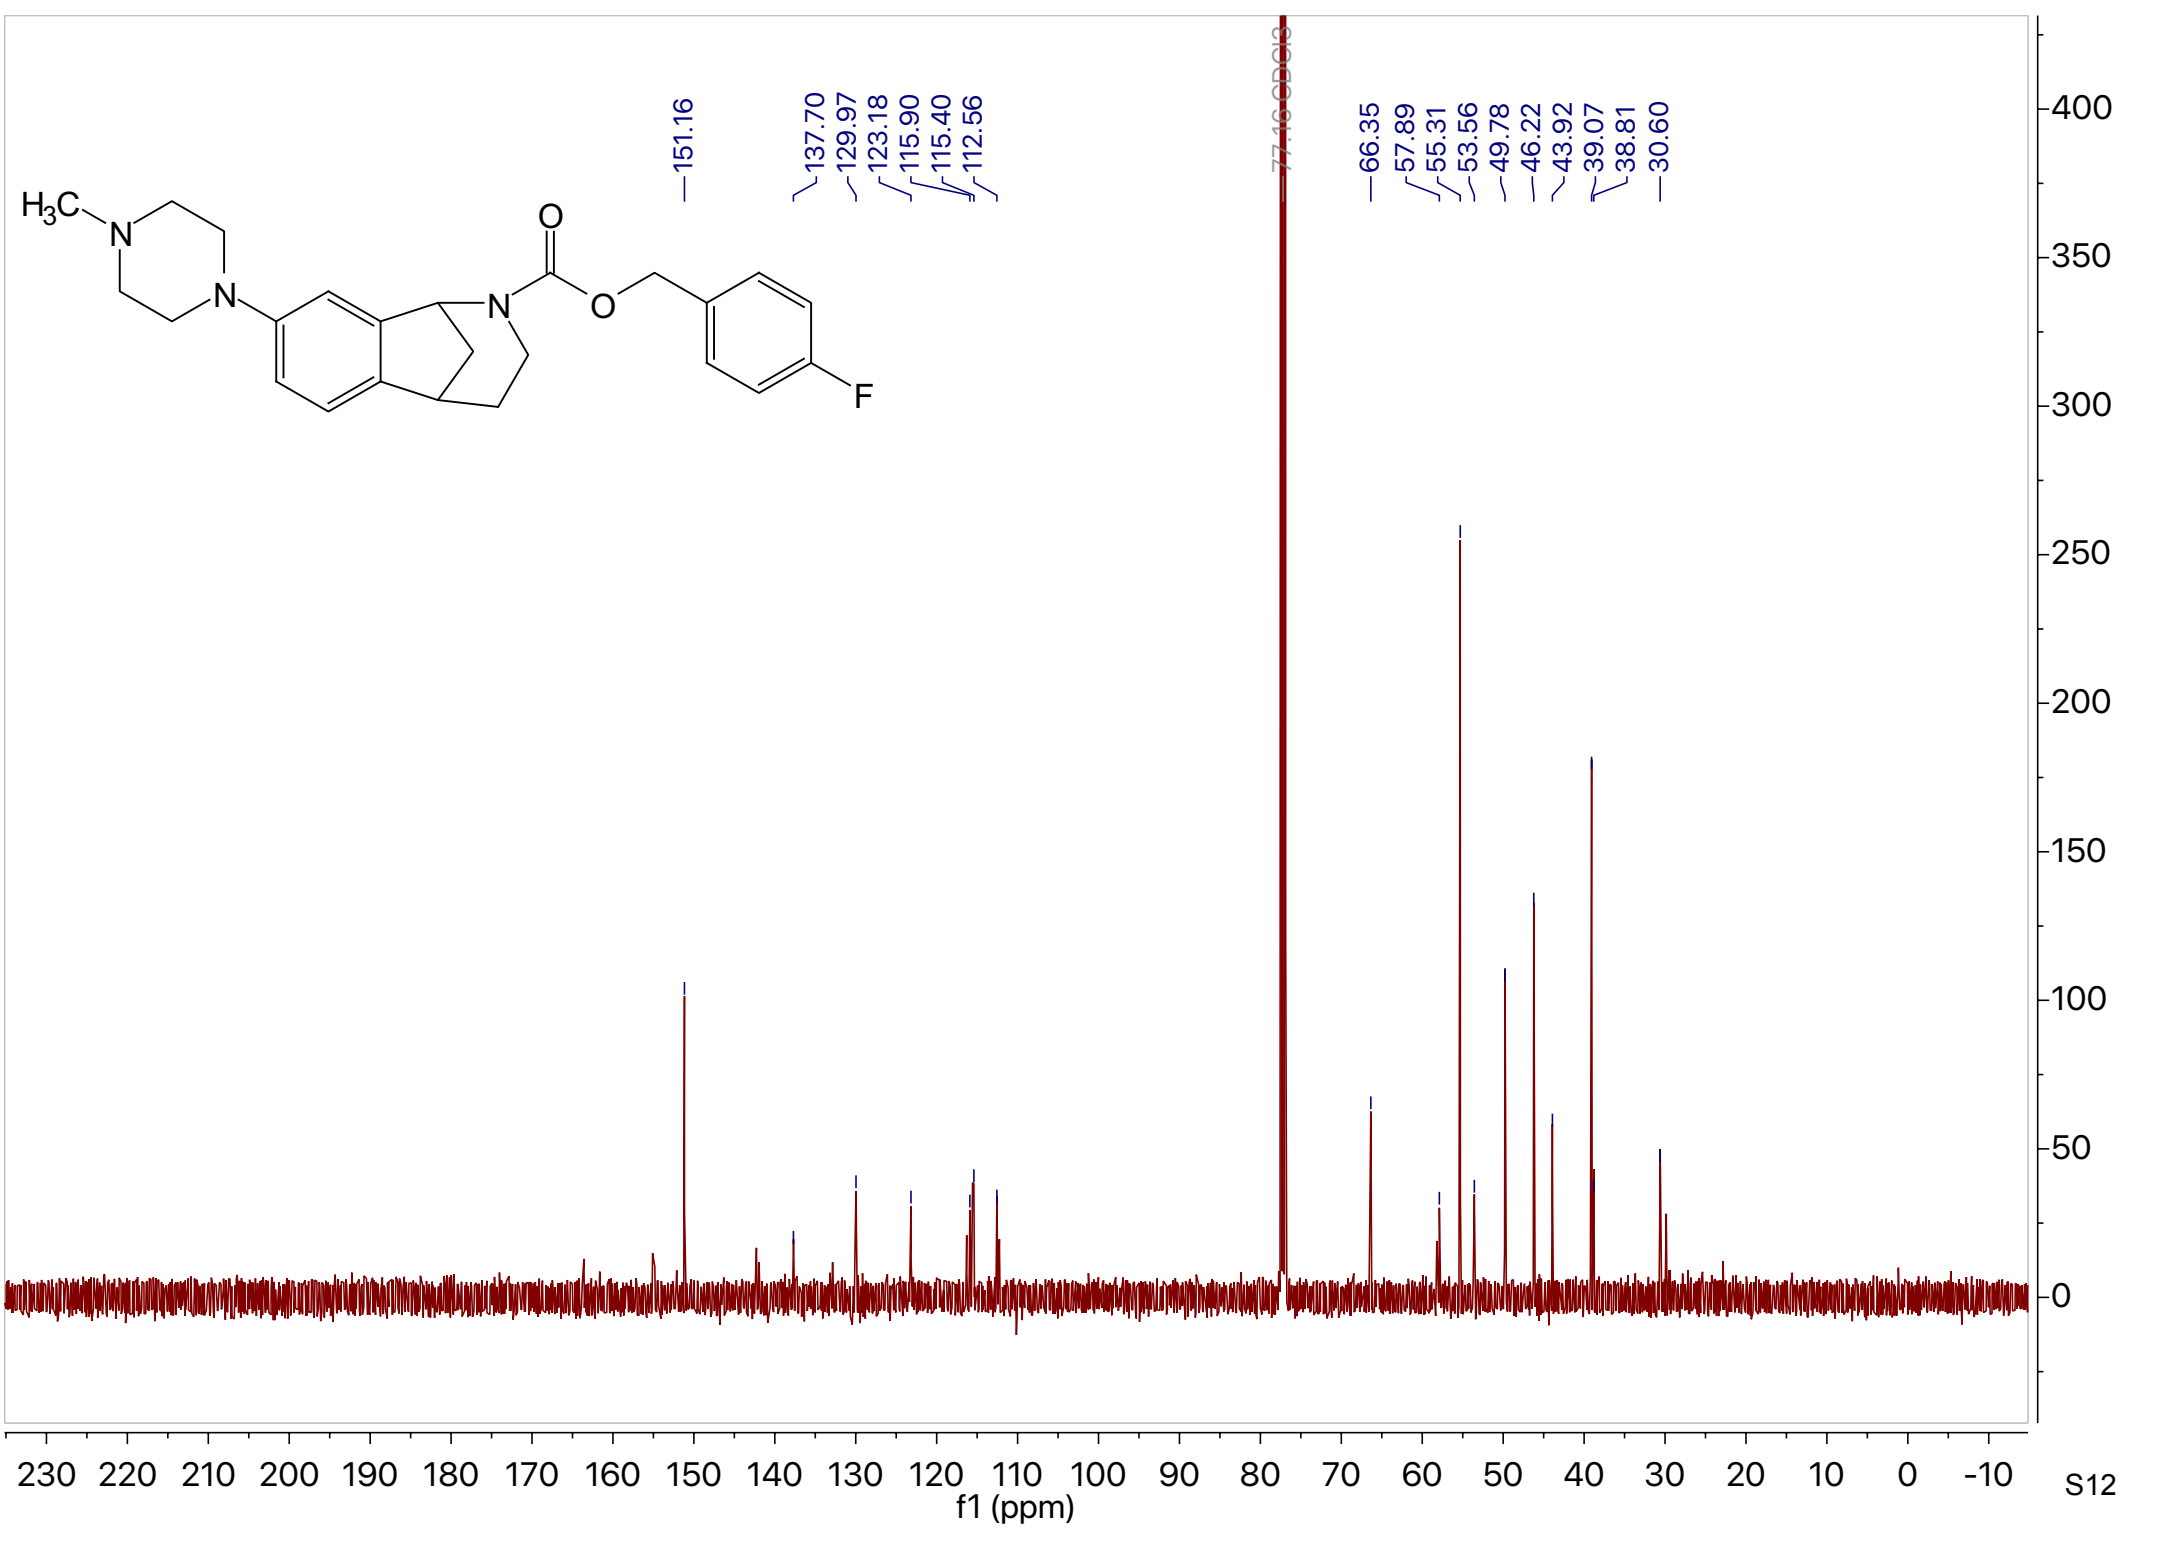

7.52  
7.52  
7.50  
7.48  
7.48  
7.46  
7.44  
7.40  
7.34  
7.32  
7.20  
7.17  
6.01  
6.00  
5.20  
5.19  
4.29  
3.63  
3.61  
3.59  
3.58  
3.39  
2.87  
2.76  
2.75  
2.73  
2.72  
2.70  
2.68  
2.51  
2.49  
2.34  
2.30  
2.29  
2.27  
2.06  
2.05  
2.04  
2.03  
2.03  
2.01  
2.00  
1.85  
1.82  
1.77  
1.74  
1.71  
1.68  
1.59  
1.55  
1.47  
1.46  
1.45

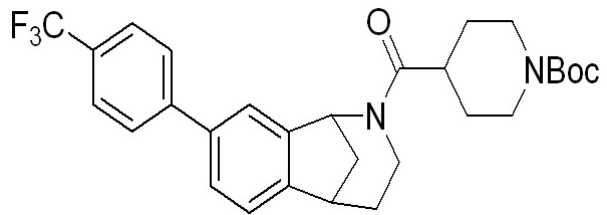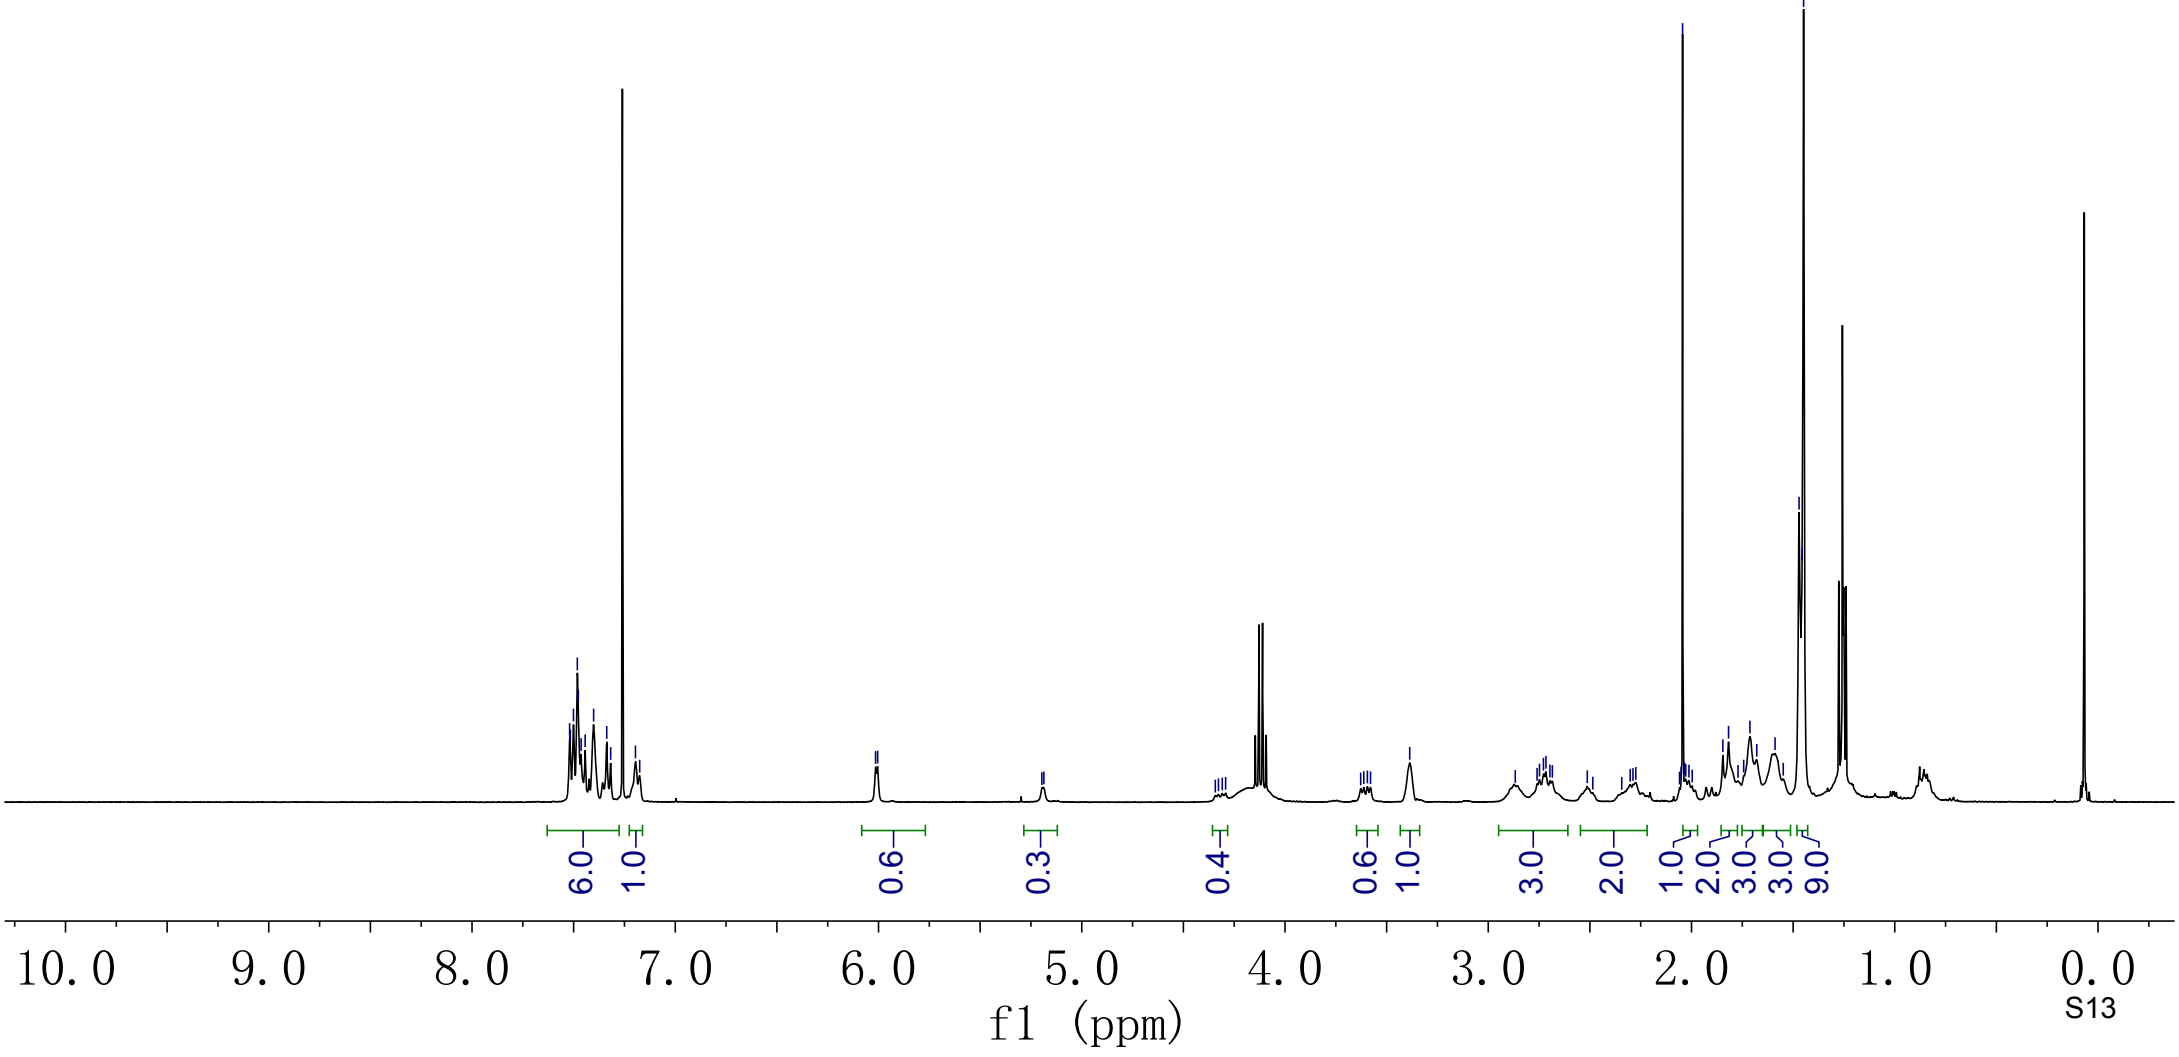

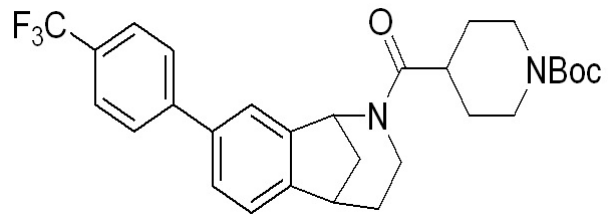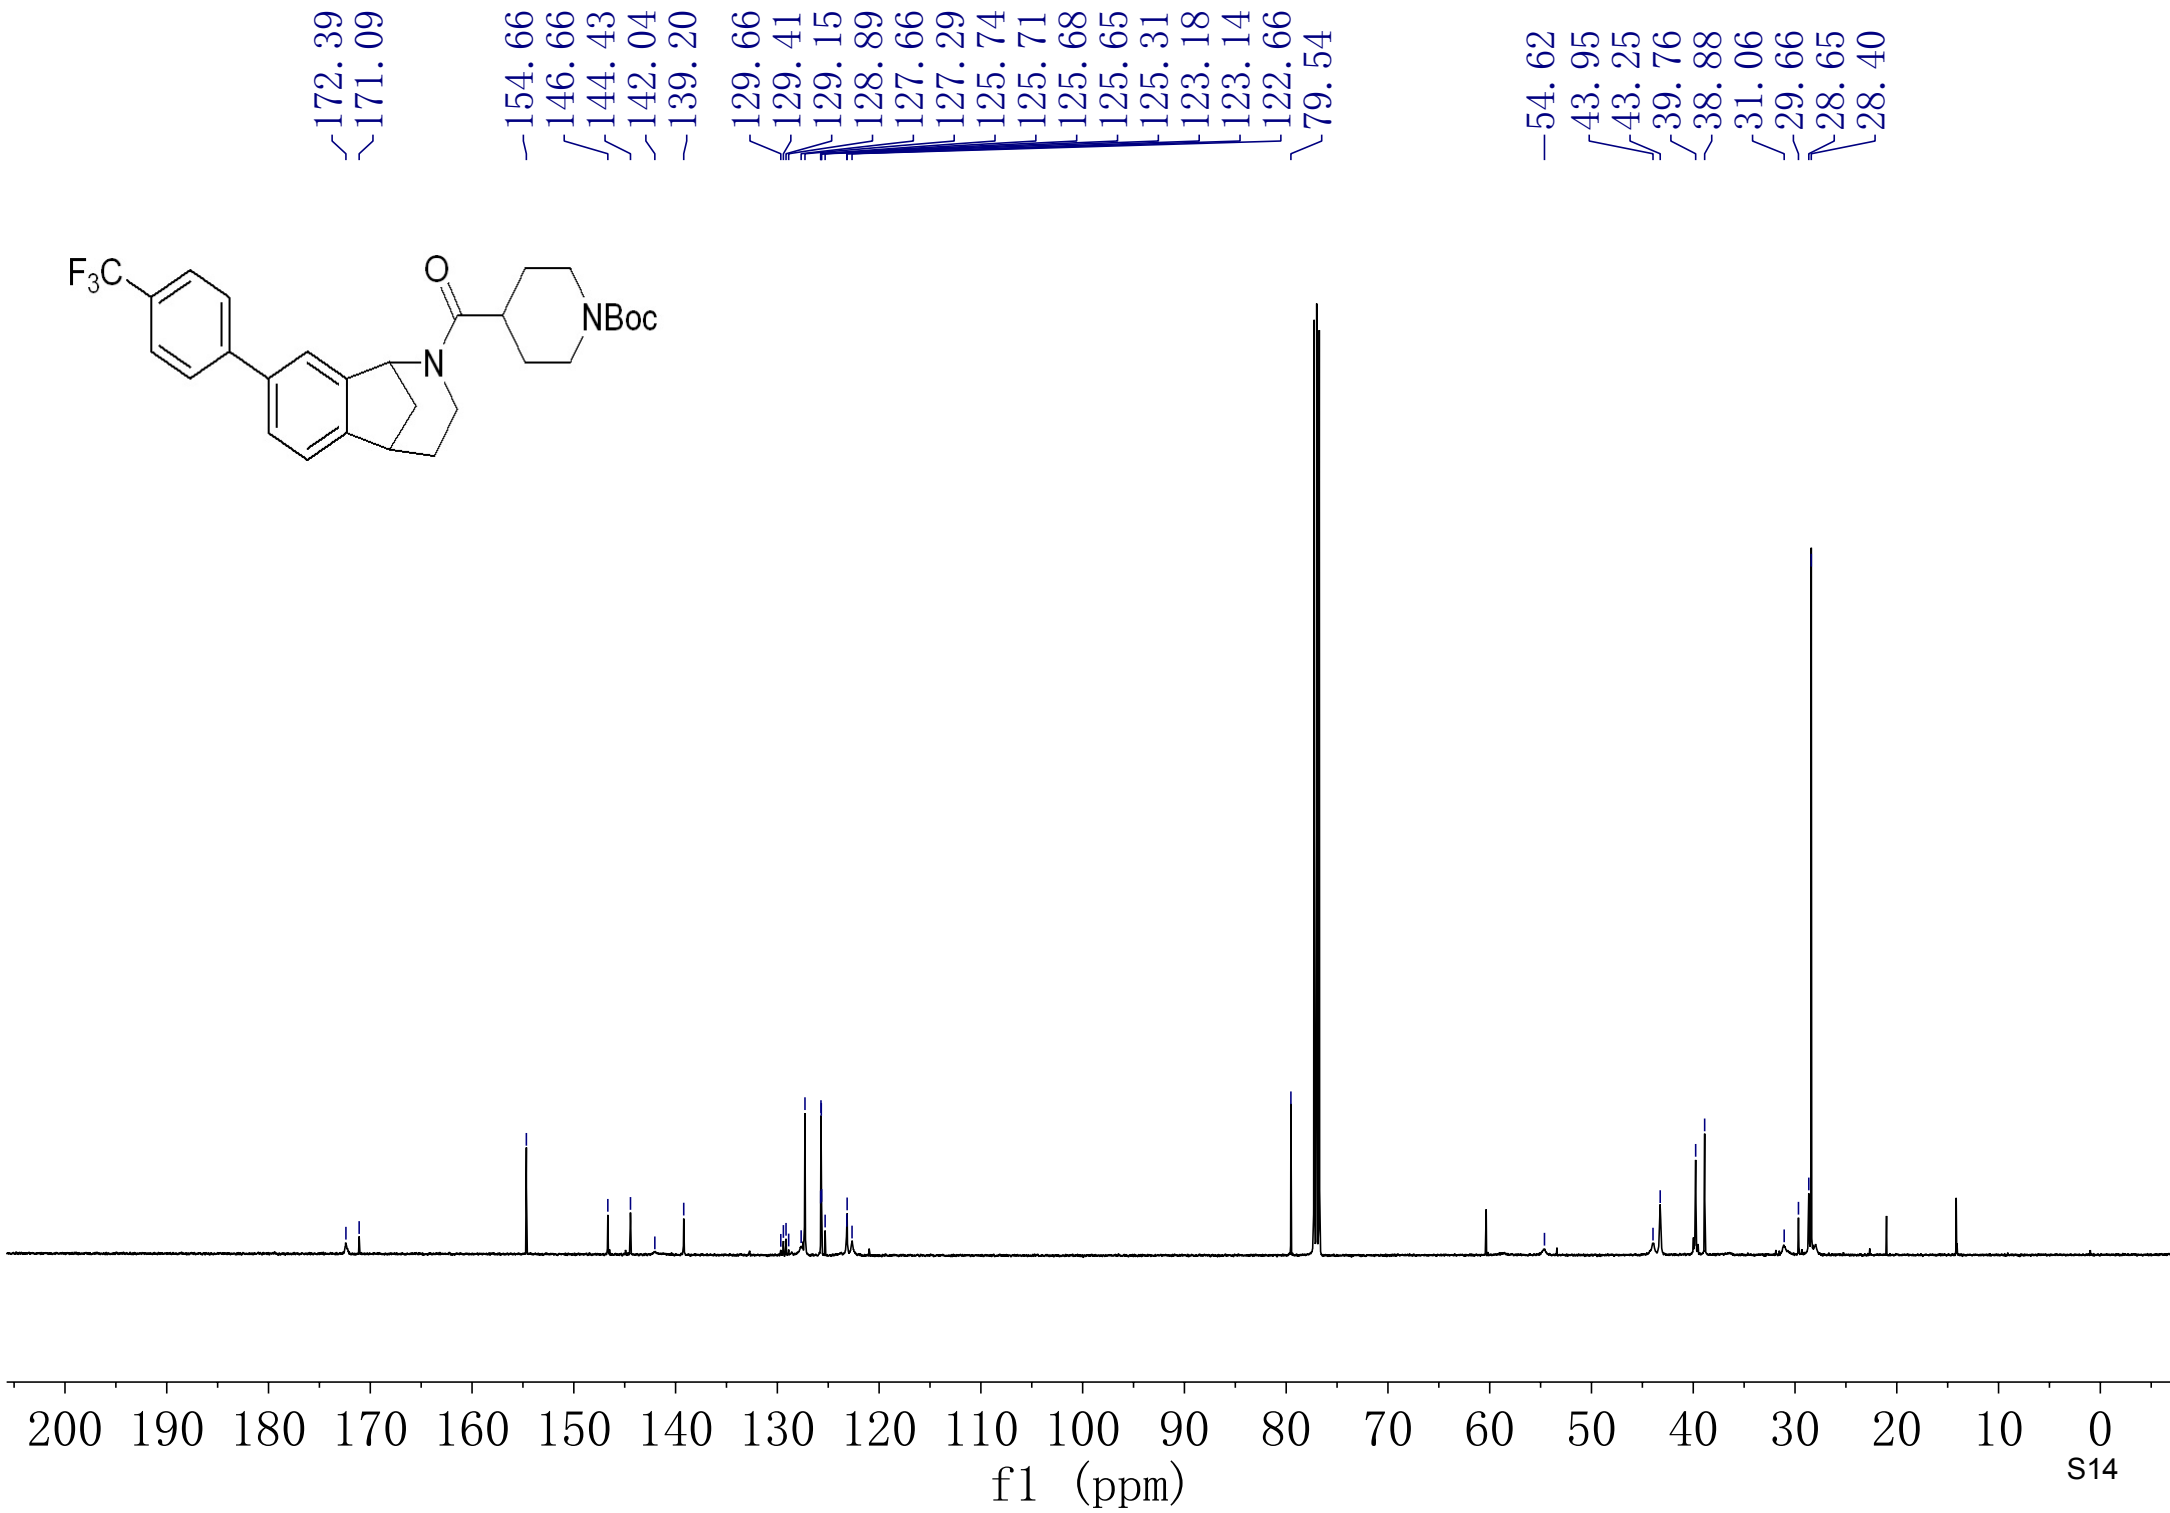

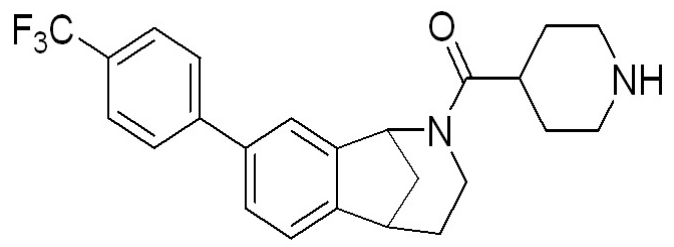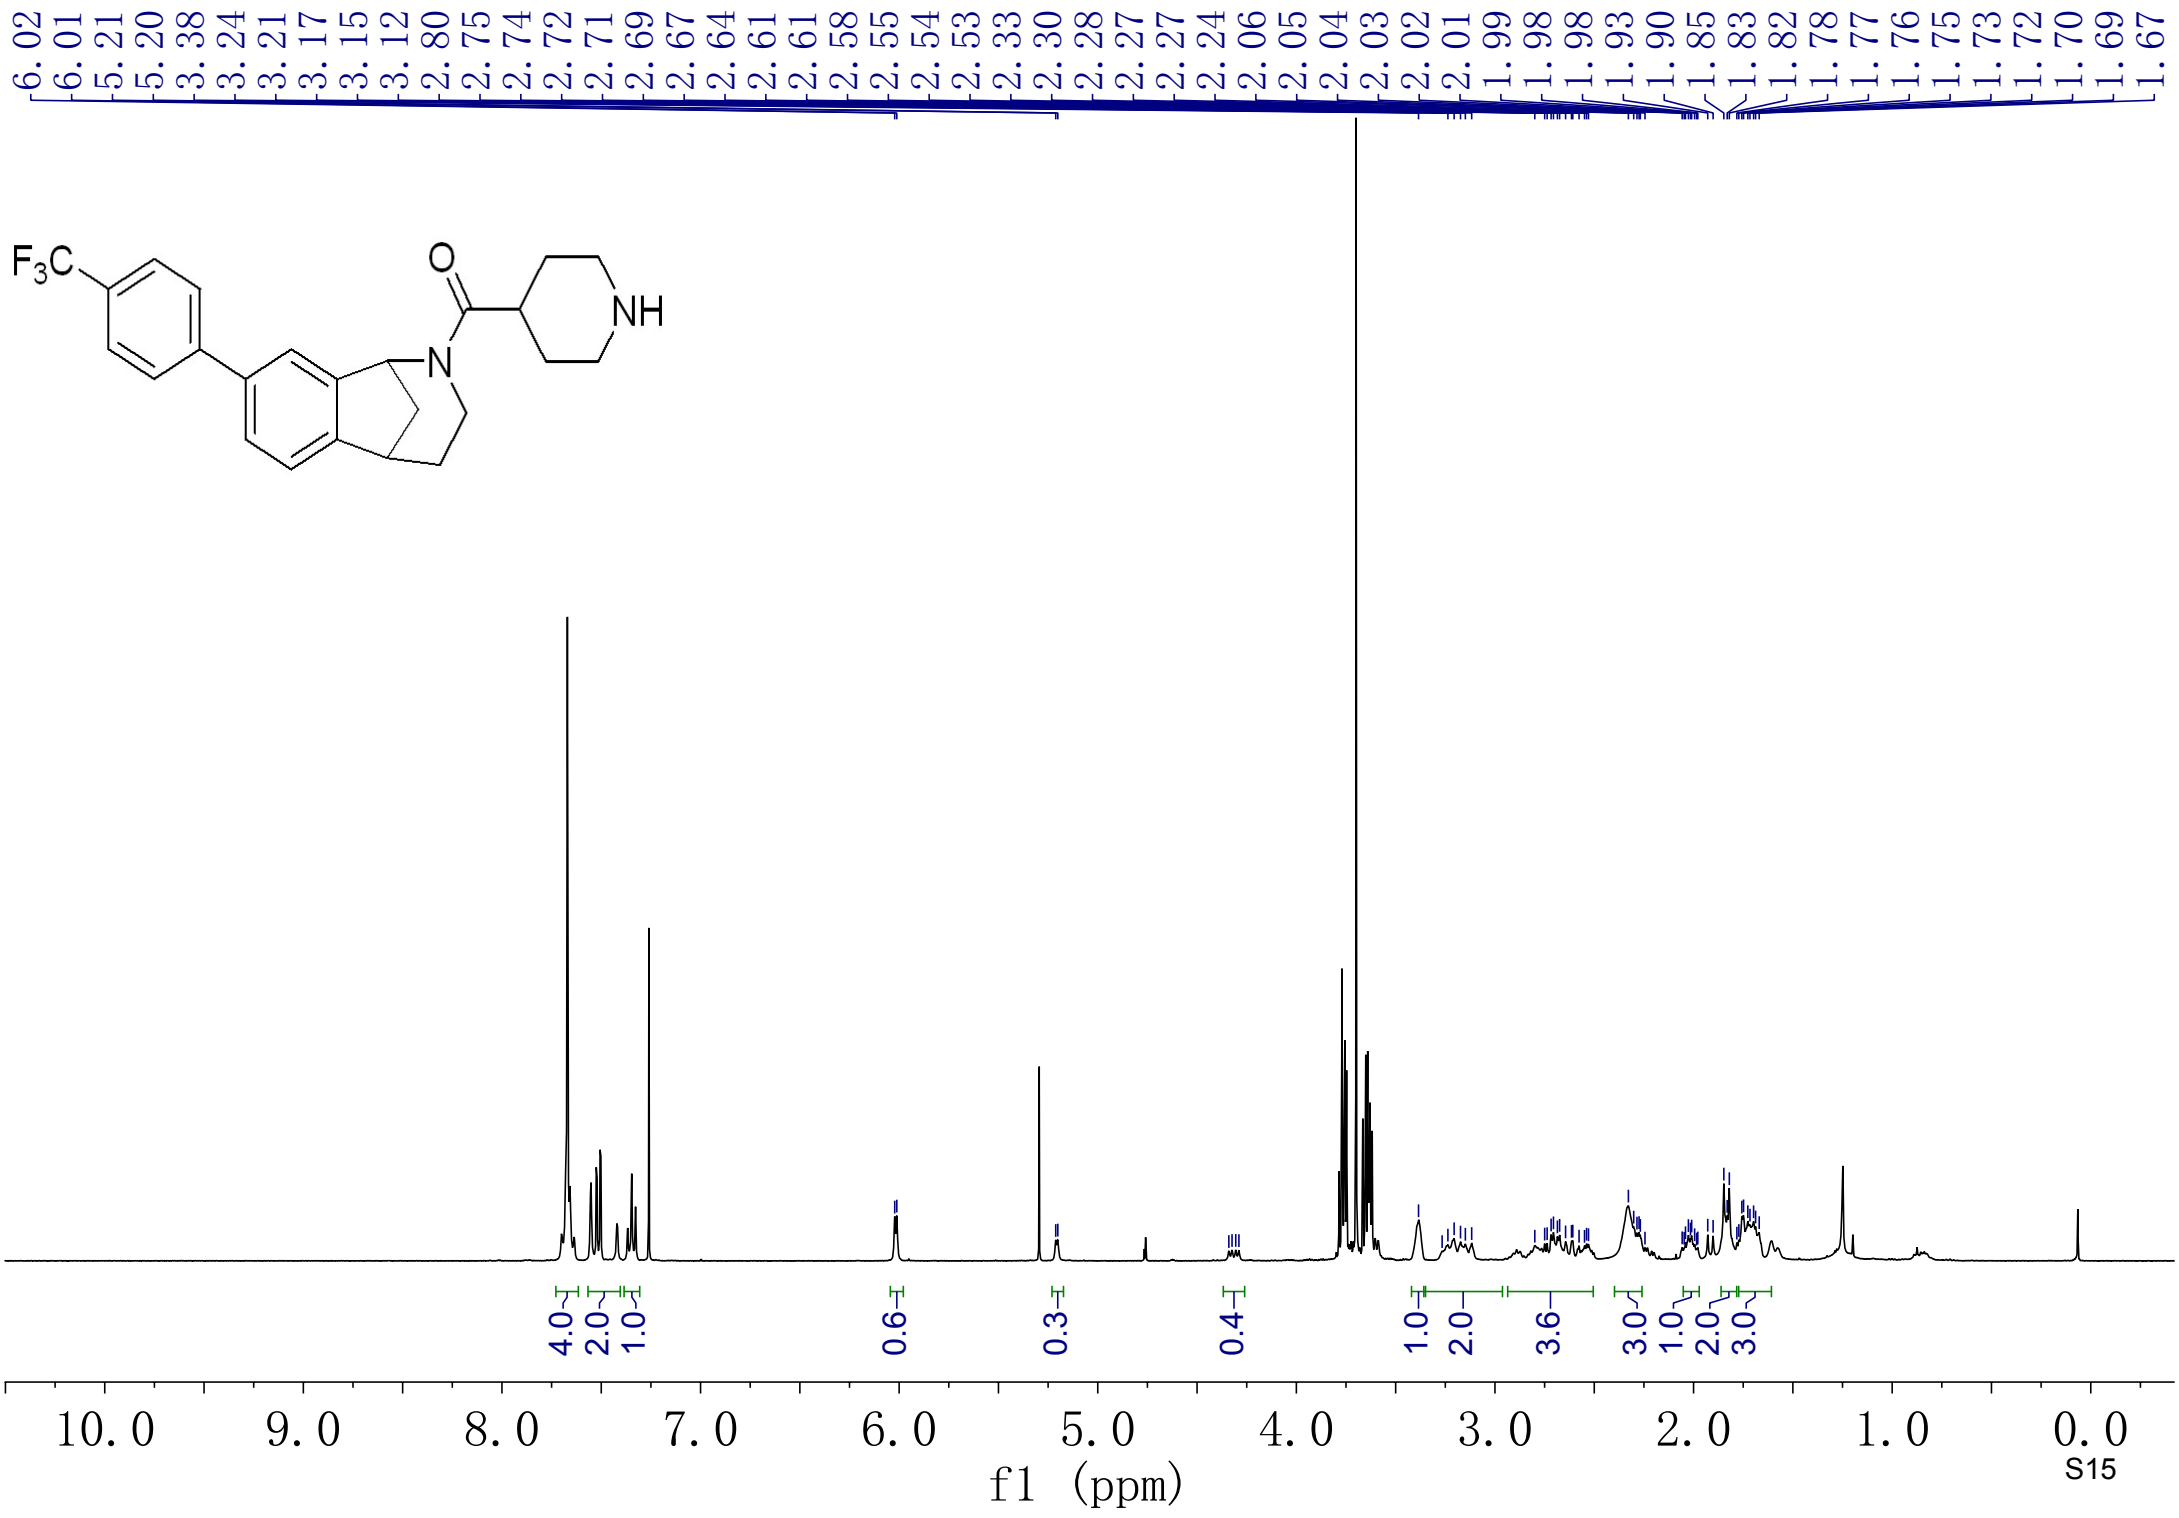

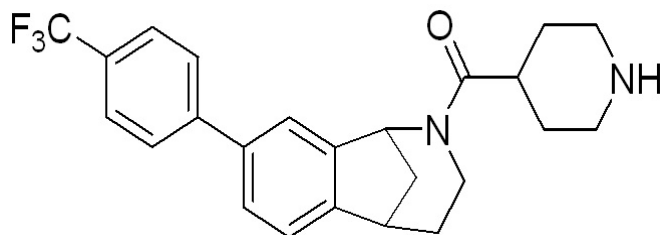

171.14  
170.92

146.57  
144.33  
141.73  
139.38  
139.31  
129.67  
129.43  
129.17  
128.90  
127.42  
127.30  
125.73  
125.69  
125.31  
123.20  
123.15  
122.78

77.00

59.08  
54.89  
43.77  
42.75  
42.57  
40.21  
39.63  
35.09  
31.07

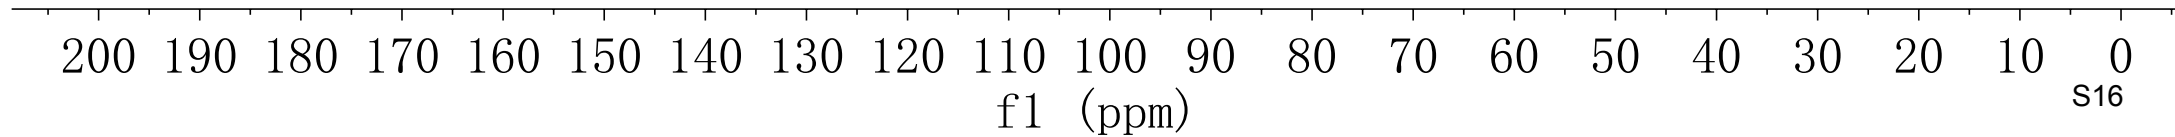



7.70  
7.68  
7.67  
7.65  
7.63  
7.53  
7.51  
7.50  
7.41  
7.36  
7.35  
7.33  
7.33  
5.99  
5.98  
3.39  
3.21  
3.19  
3.18  
3.16  
3.16  
3.15  
3.15  
2.71  
2.61  
2.58  
2.58  
2.56  
2.28  
2.06  
2.05  
2.04  
2.03  
2.02  
2.01  
2.00  
2.00  
1.99  
1.98  
1.97  
1.92  
1.90  
1.89  
1.84  
1.81  
1.71  
1.70  
1.68  
1.67  
1.66  
1.65  
0.96  
0.94  
0.94  
0.92  
0.91

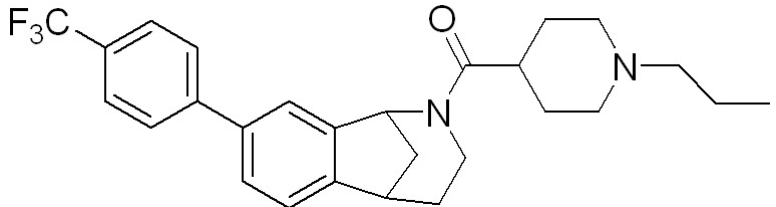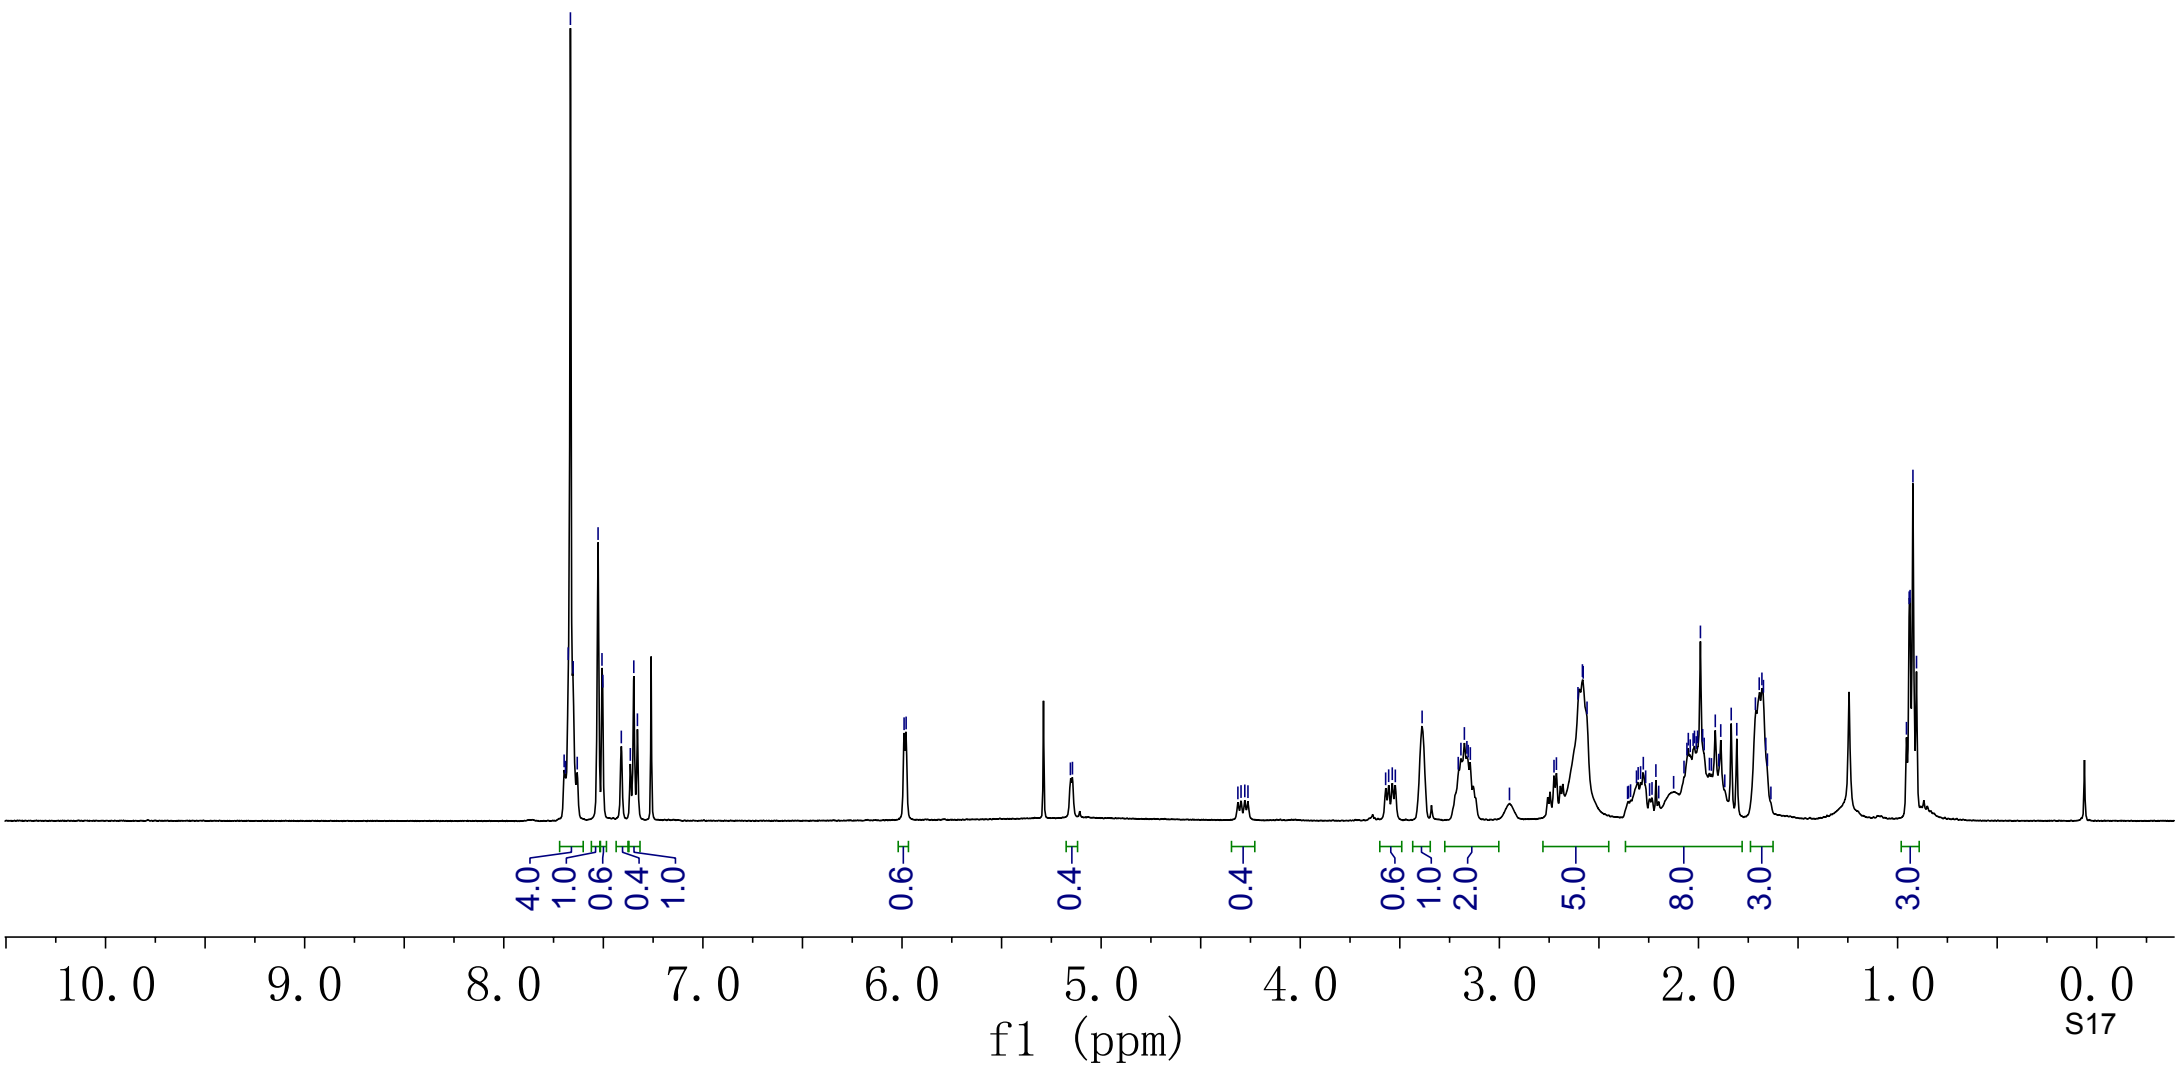

172.21  
171.92

146.64  
146.45  
144.38  
141.91  
140.91  
139.33  
139.22  
128.20  
127.69  
127.37  
127.26  
125.76  
125.74  
125.71  
125.68  
125.65  
123.45  
123.18  
122.74  
122.26

59.54  
59.39  
58.95  
44.40  
43.83  
40.10  
39.77  
39.65  
36.38  
31.11  
30.44  
29.66  
18.45  
18.27  
11.58  
11.52

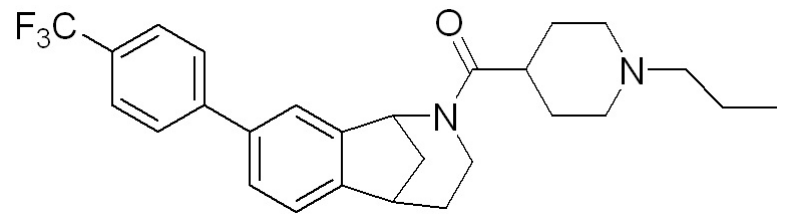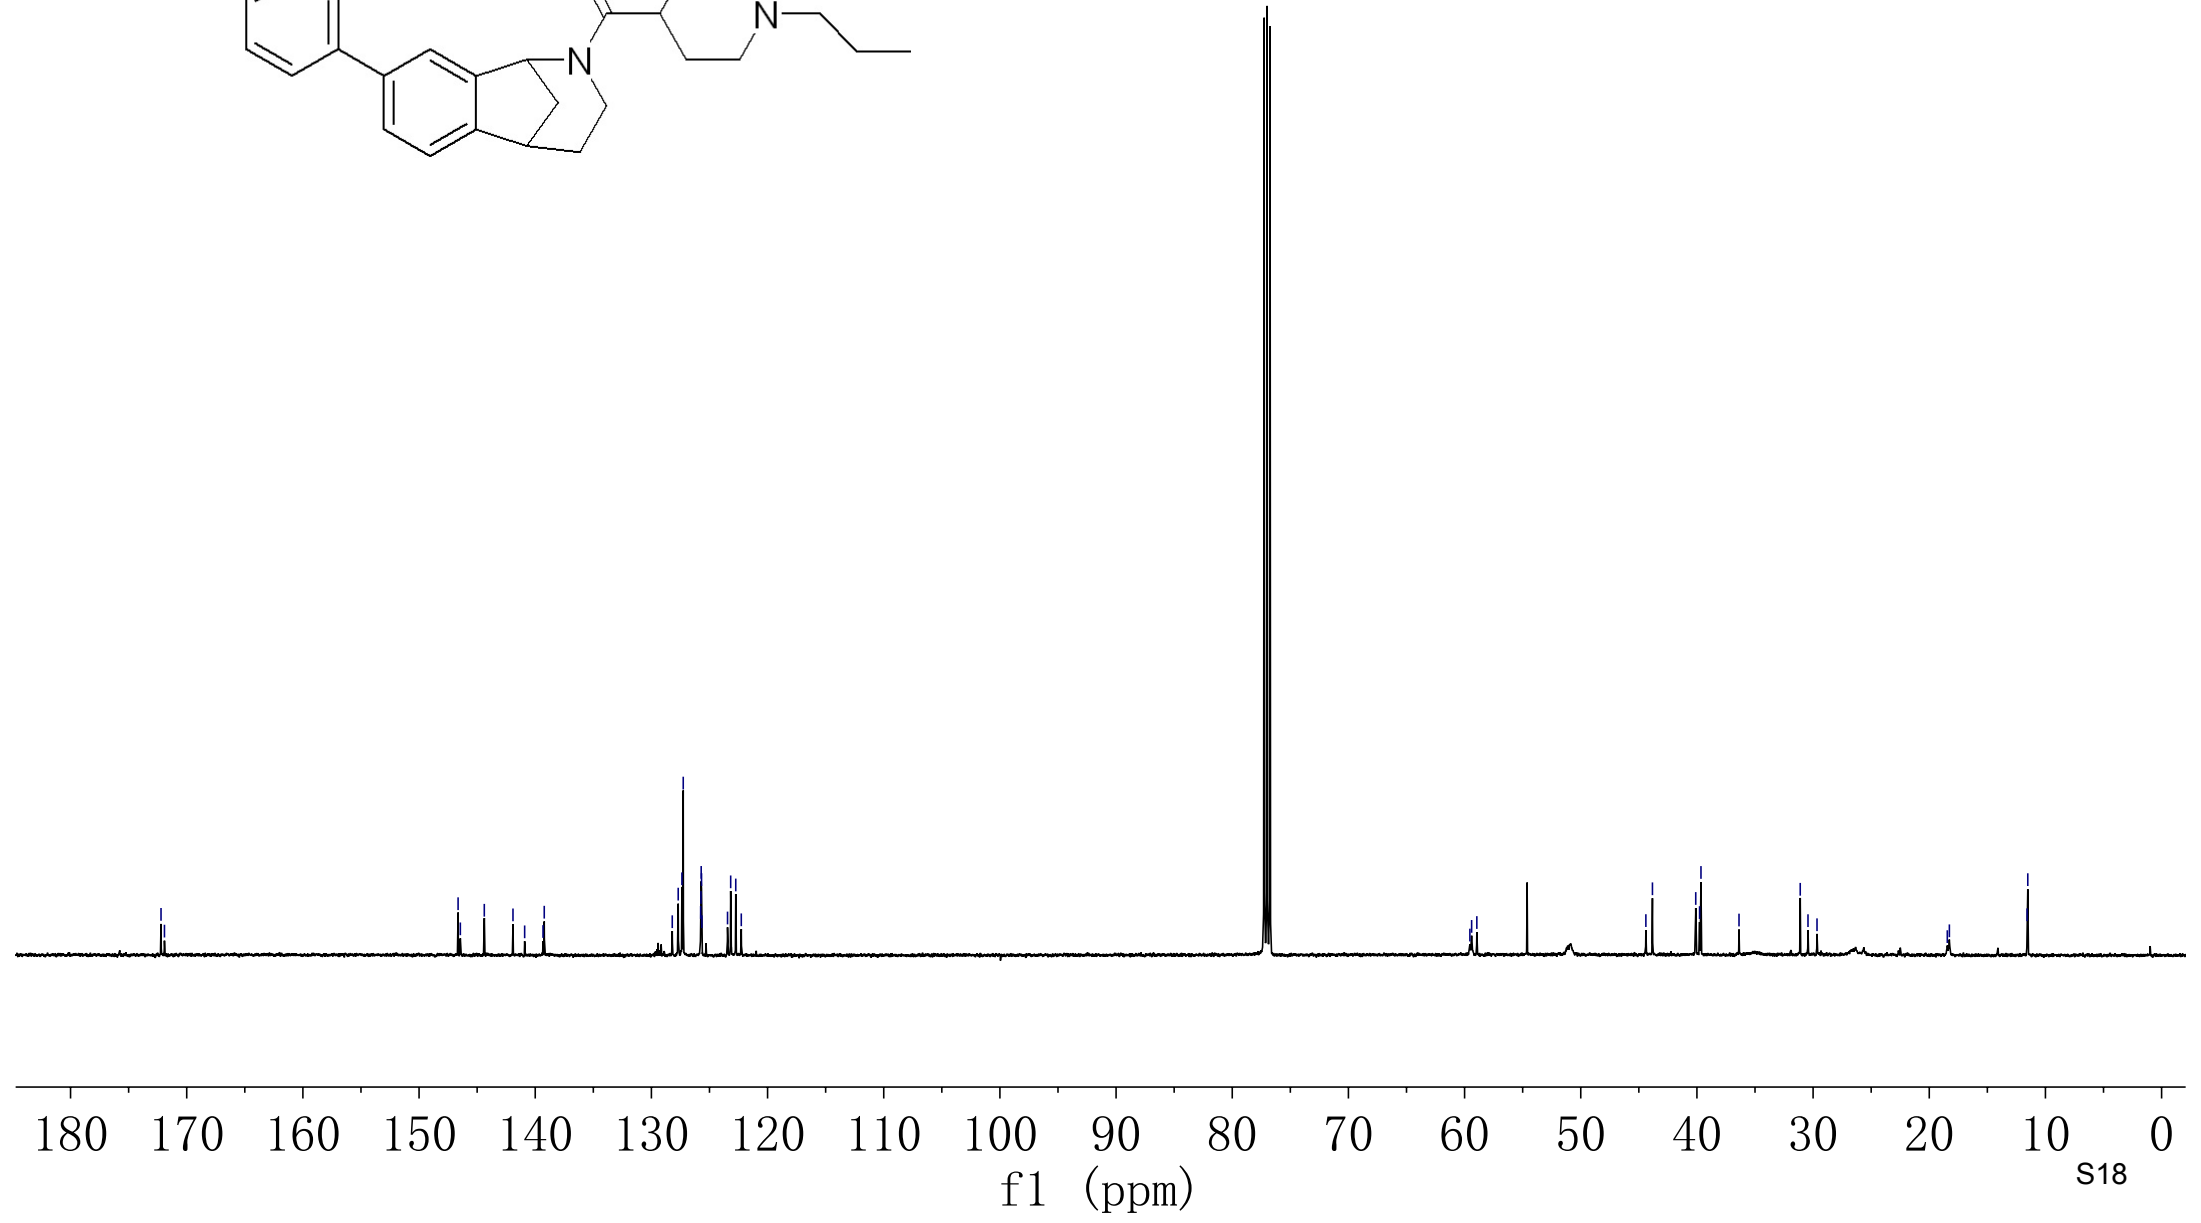

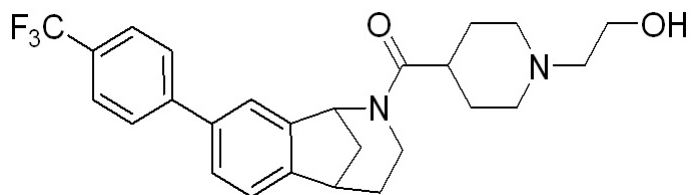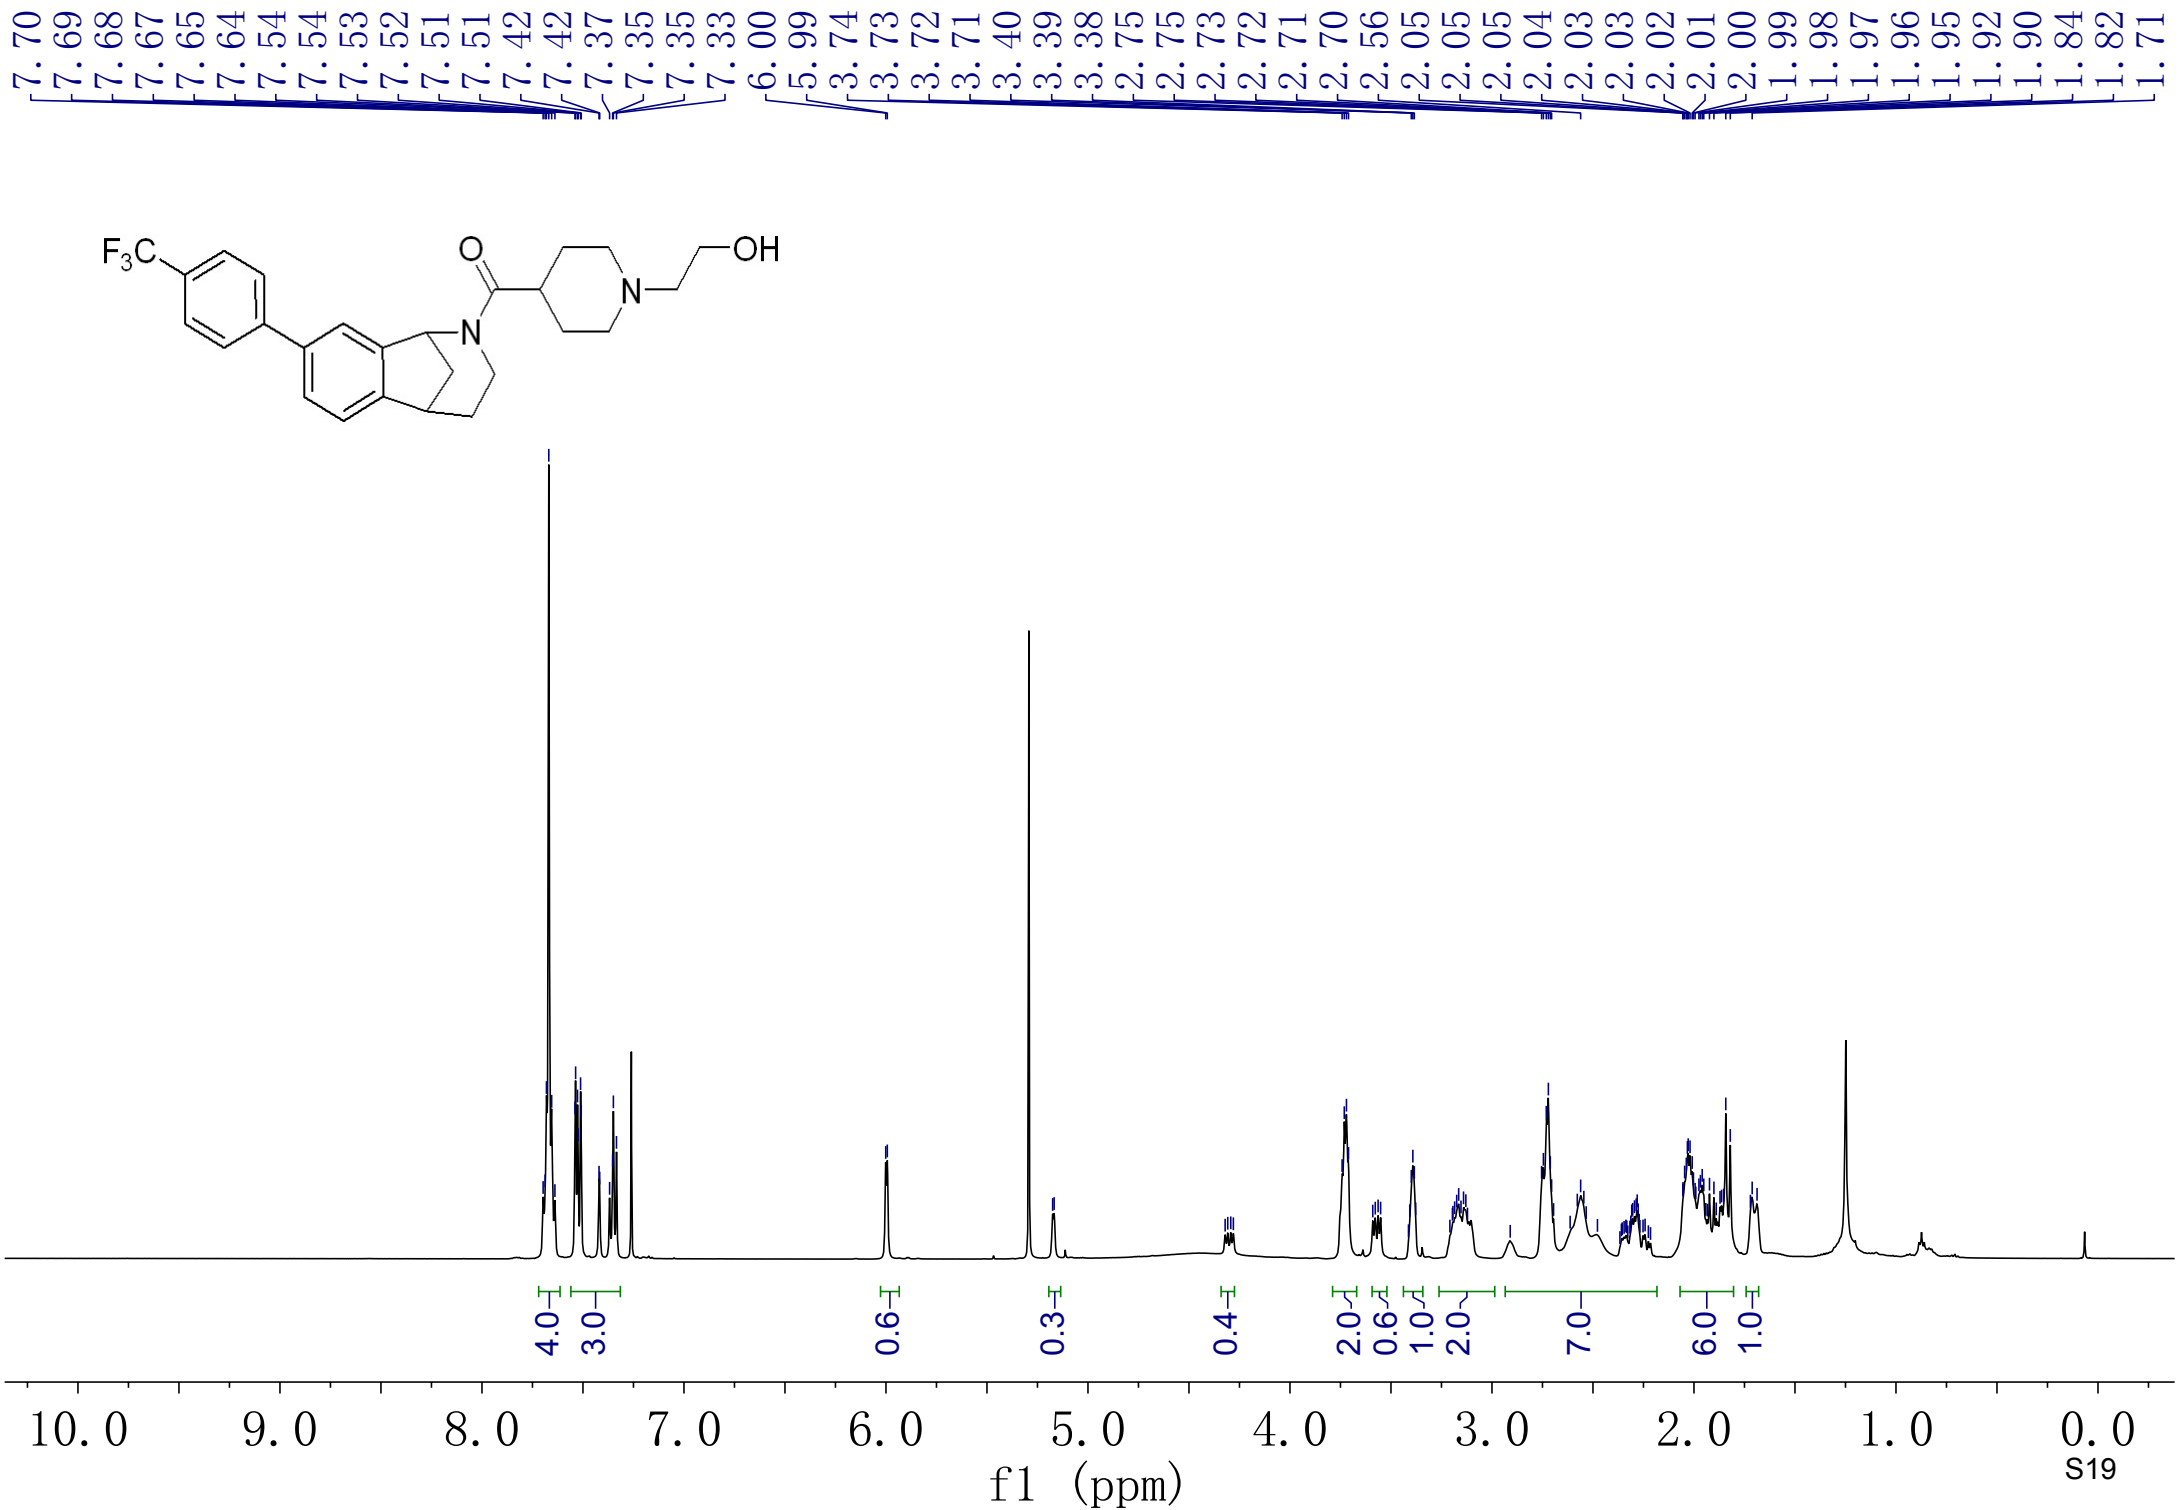

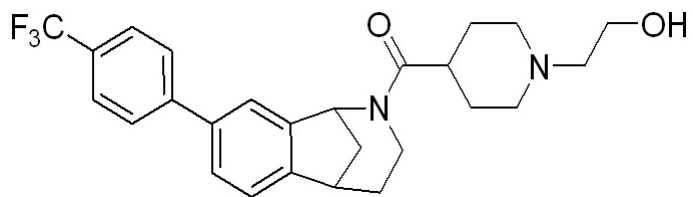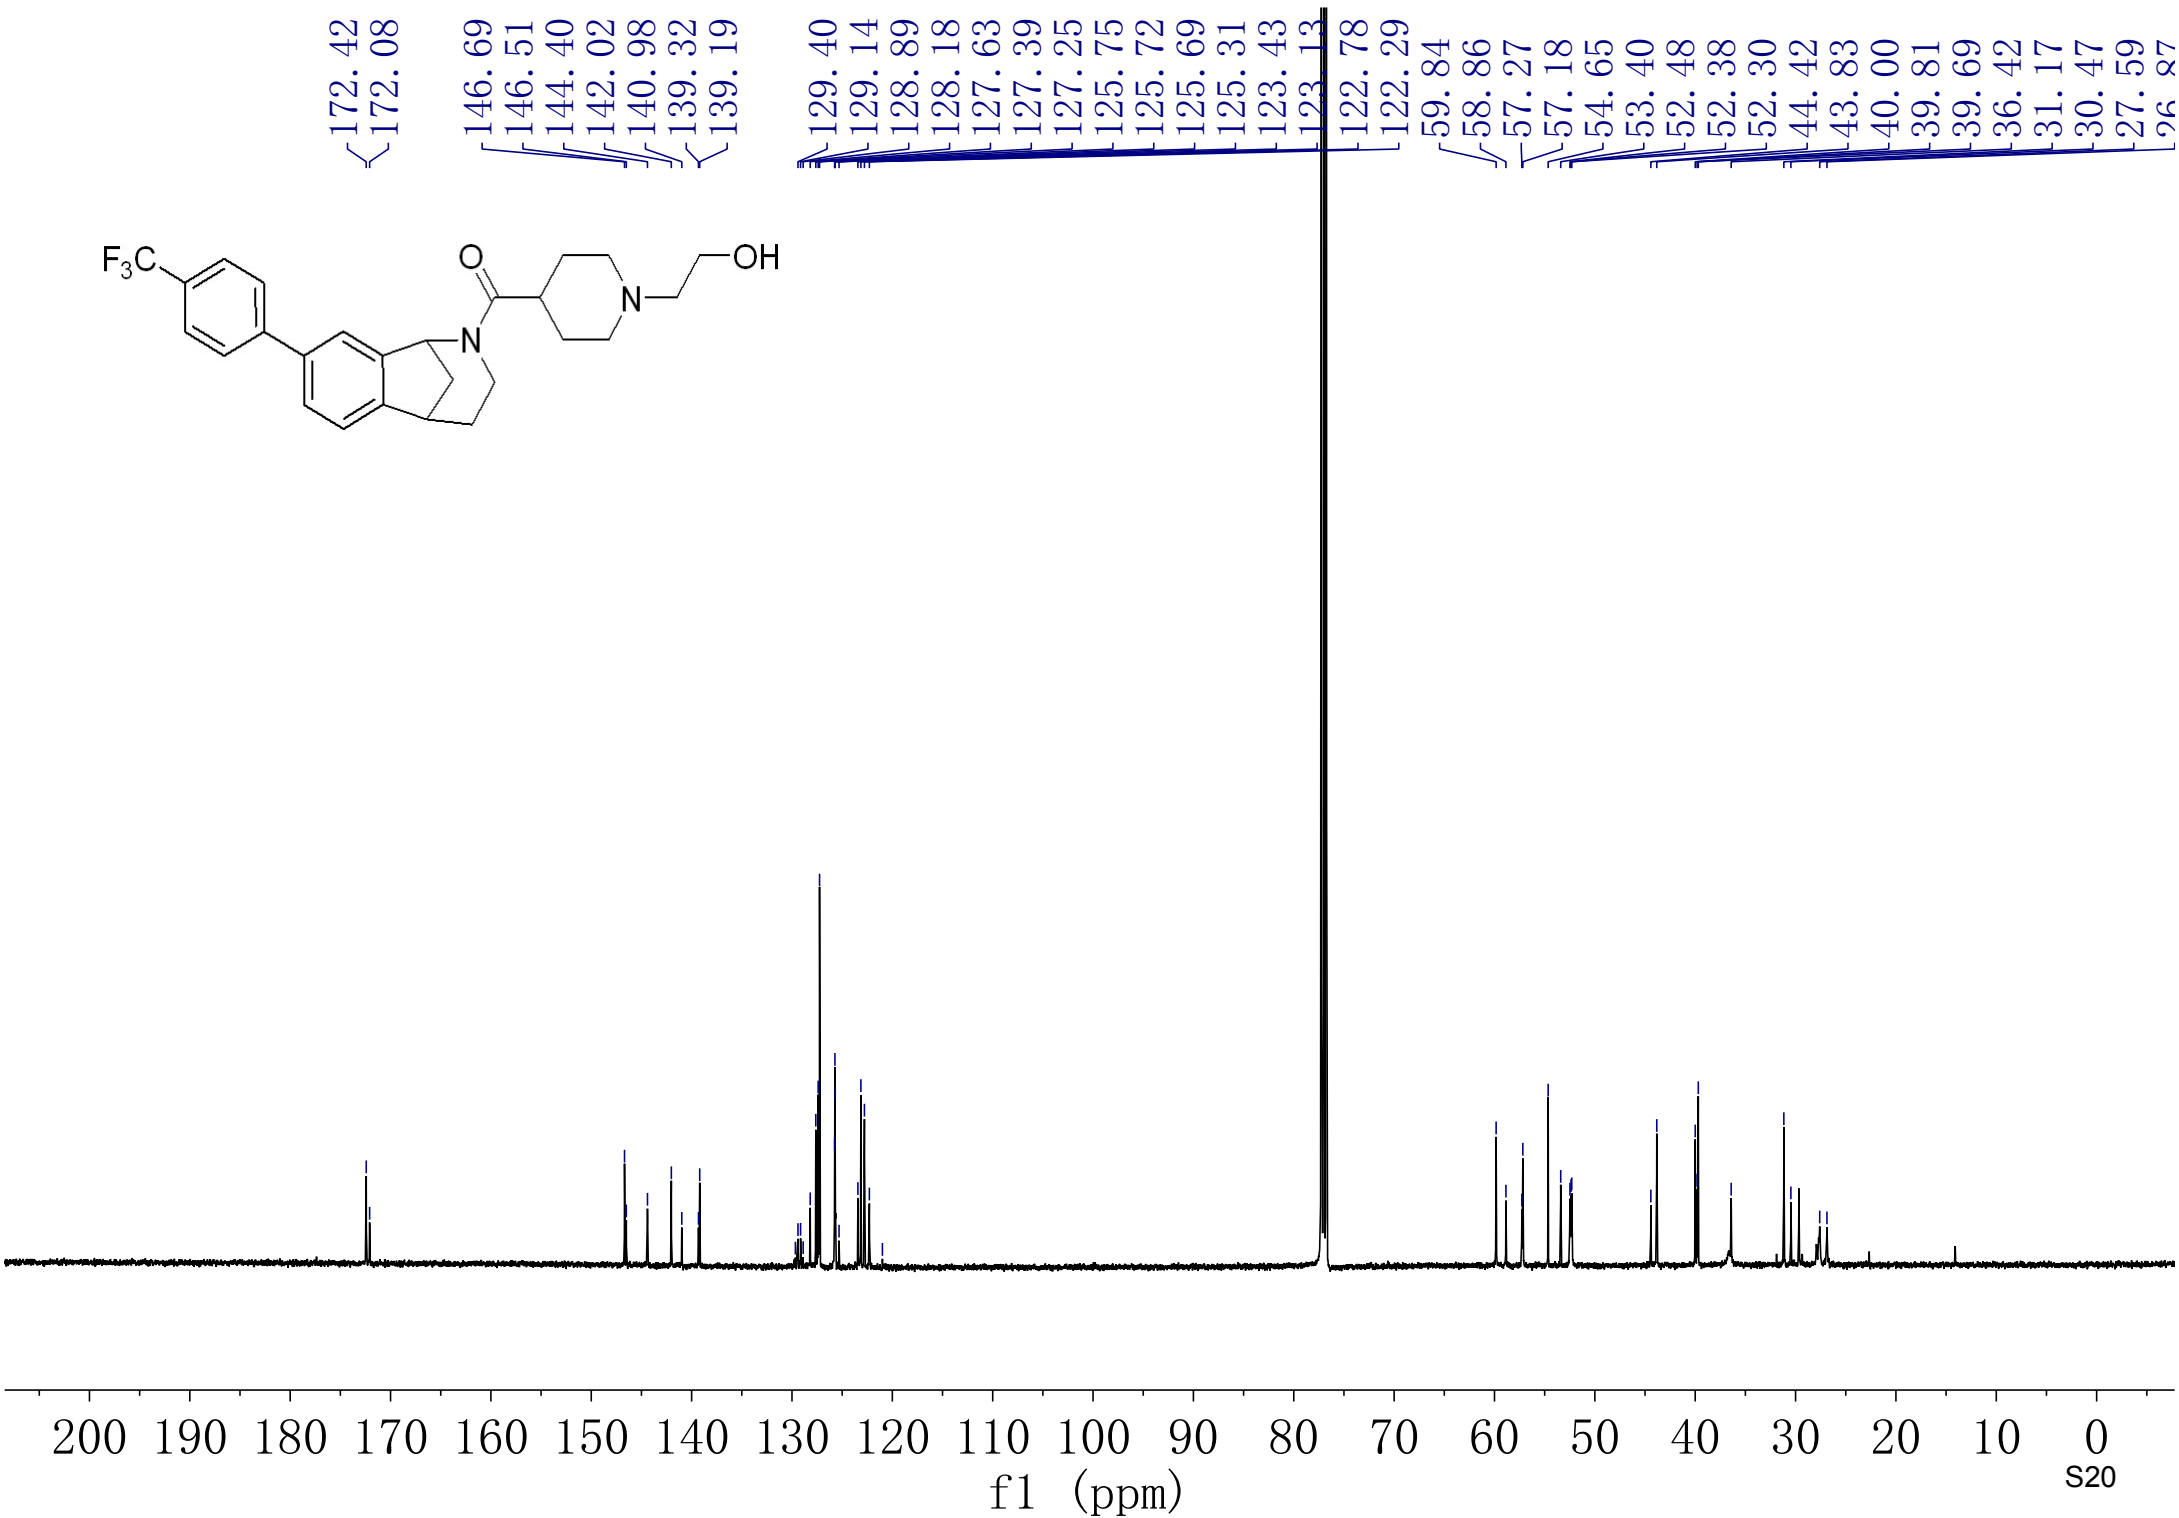



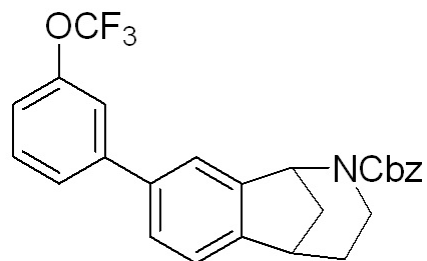

154.88  
149.67  
149.65  
149.64  
149.62  
146.25  
143.20  
138.97  
130.00  
128.46  
127.96  
127.87  
127.43  
125.42  
123.57  
123.14  
122.51  
121.53  
119.65  
119.49  
119.41  
117.44

-67.04

-57.43

43.63

39.49

38.55

-30.21

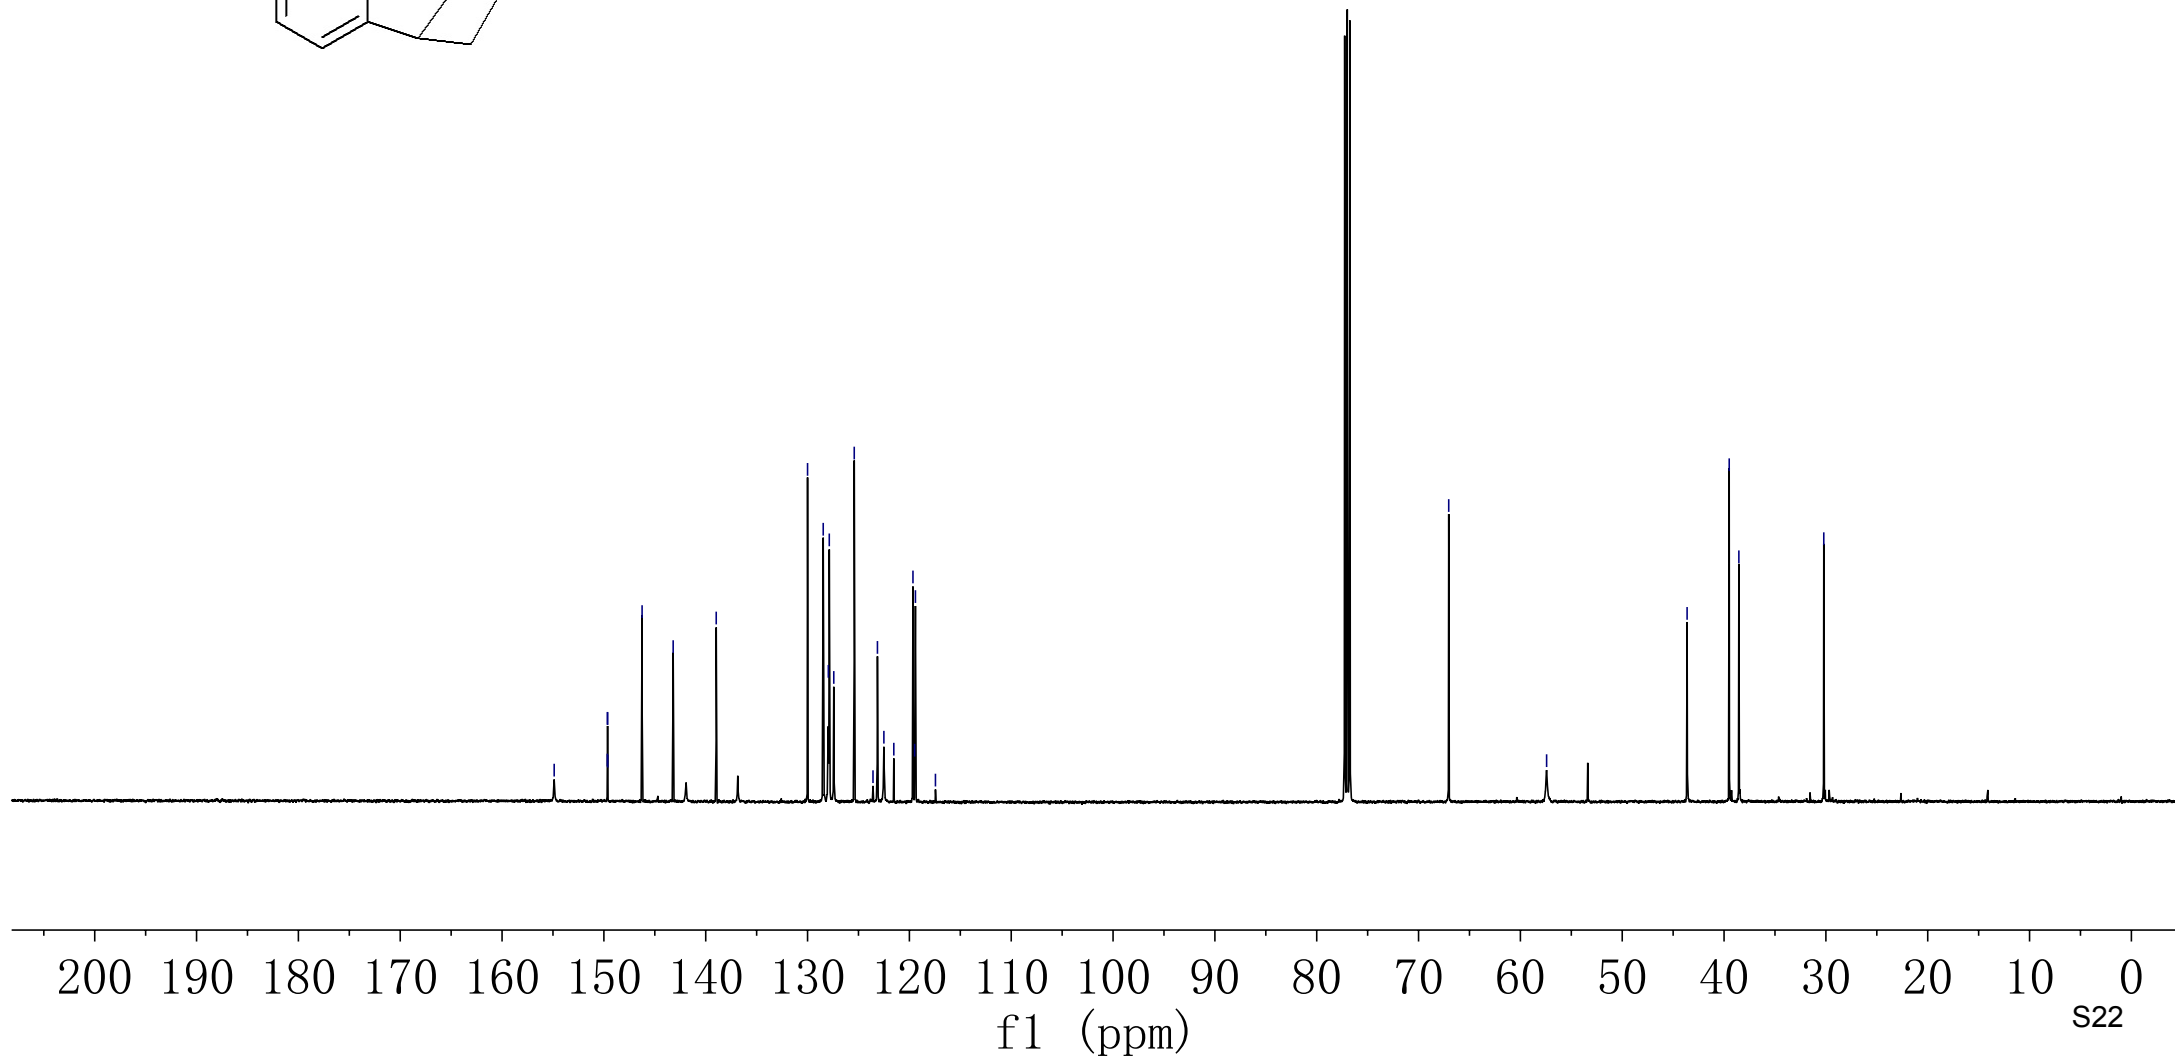

7.53  
7.53  
7.53  
7.51  
7.51  
7.51  
7.47  
7.46  
7.45  
7.45  
7.43  
7.41  
7.29  
7.27  
7.26  
7.19  
7.19  
7.18  
7.18  
7.18  
7.17  
7.17  
7.16  
7.16  
7.16  
4.36  
4.35  
3.44  
3.27  
3.25  
3.24  
2.83  
2.82  
2.80  
2.78  
2.41  
2.39  
2.37  
2.36  
2.34  
2.27  
2.27  
2.26  
2.25  
2.25  
2.24  
2.05  
2.04  
2.02  
1.61  
1.60  
1.57  
1.57

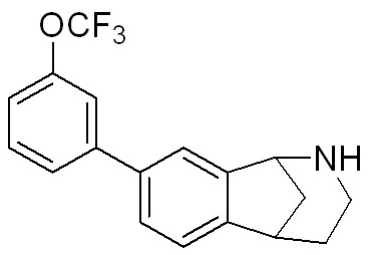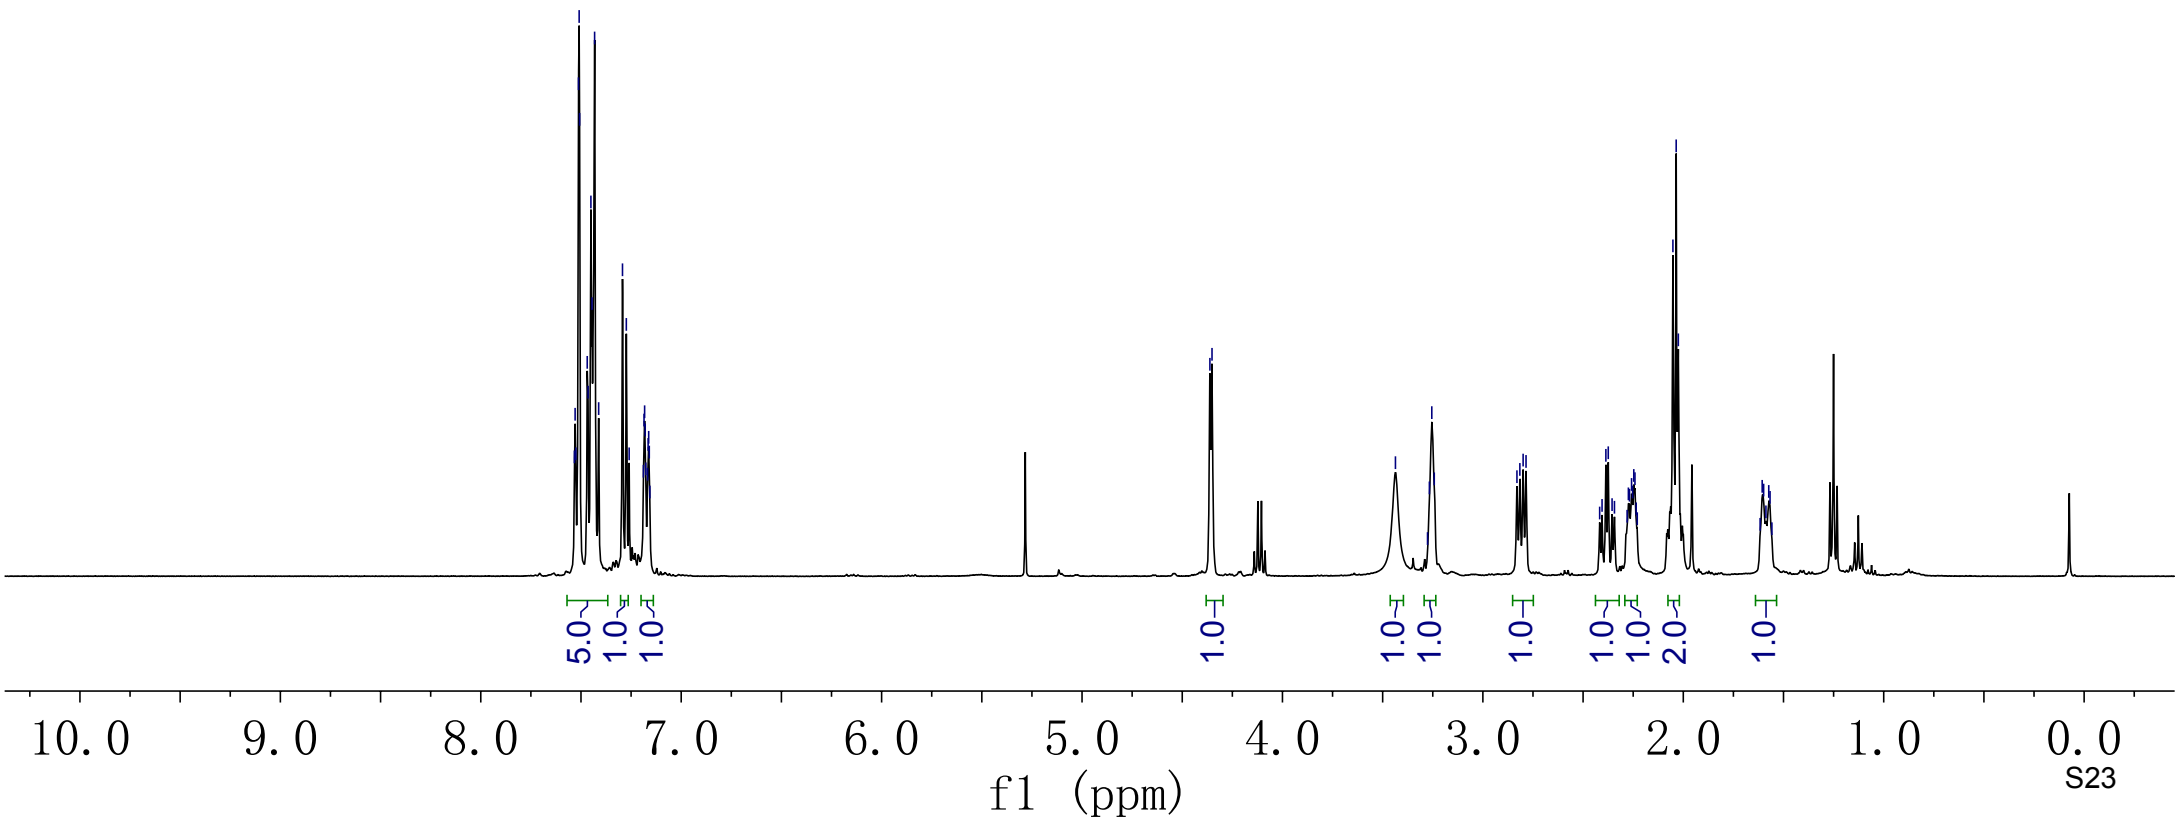

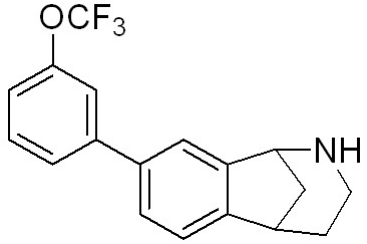

149.63  
149.61  
149.60  
146.23  
143.45  
142.91  
138.84  
129.98  
126.98  
125.40  
122.81  
122.04  
121.78  
119.60  
119.30  
119.22

-58.65

44.84

39.77

38.95

-30.63

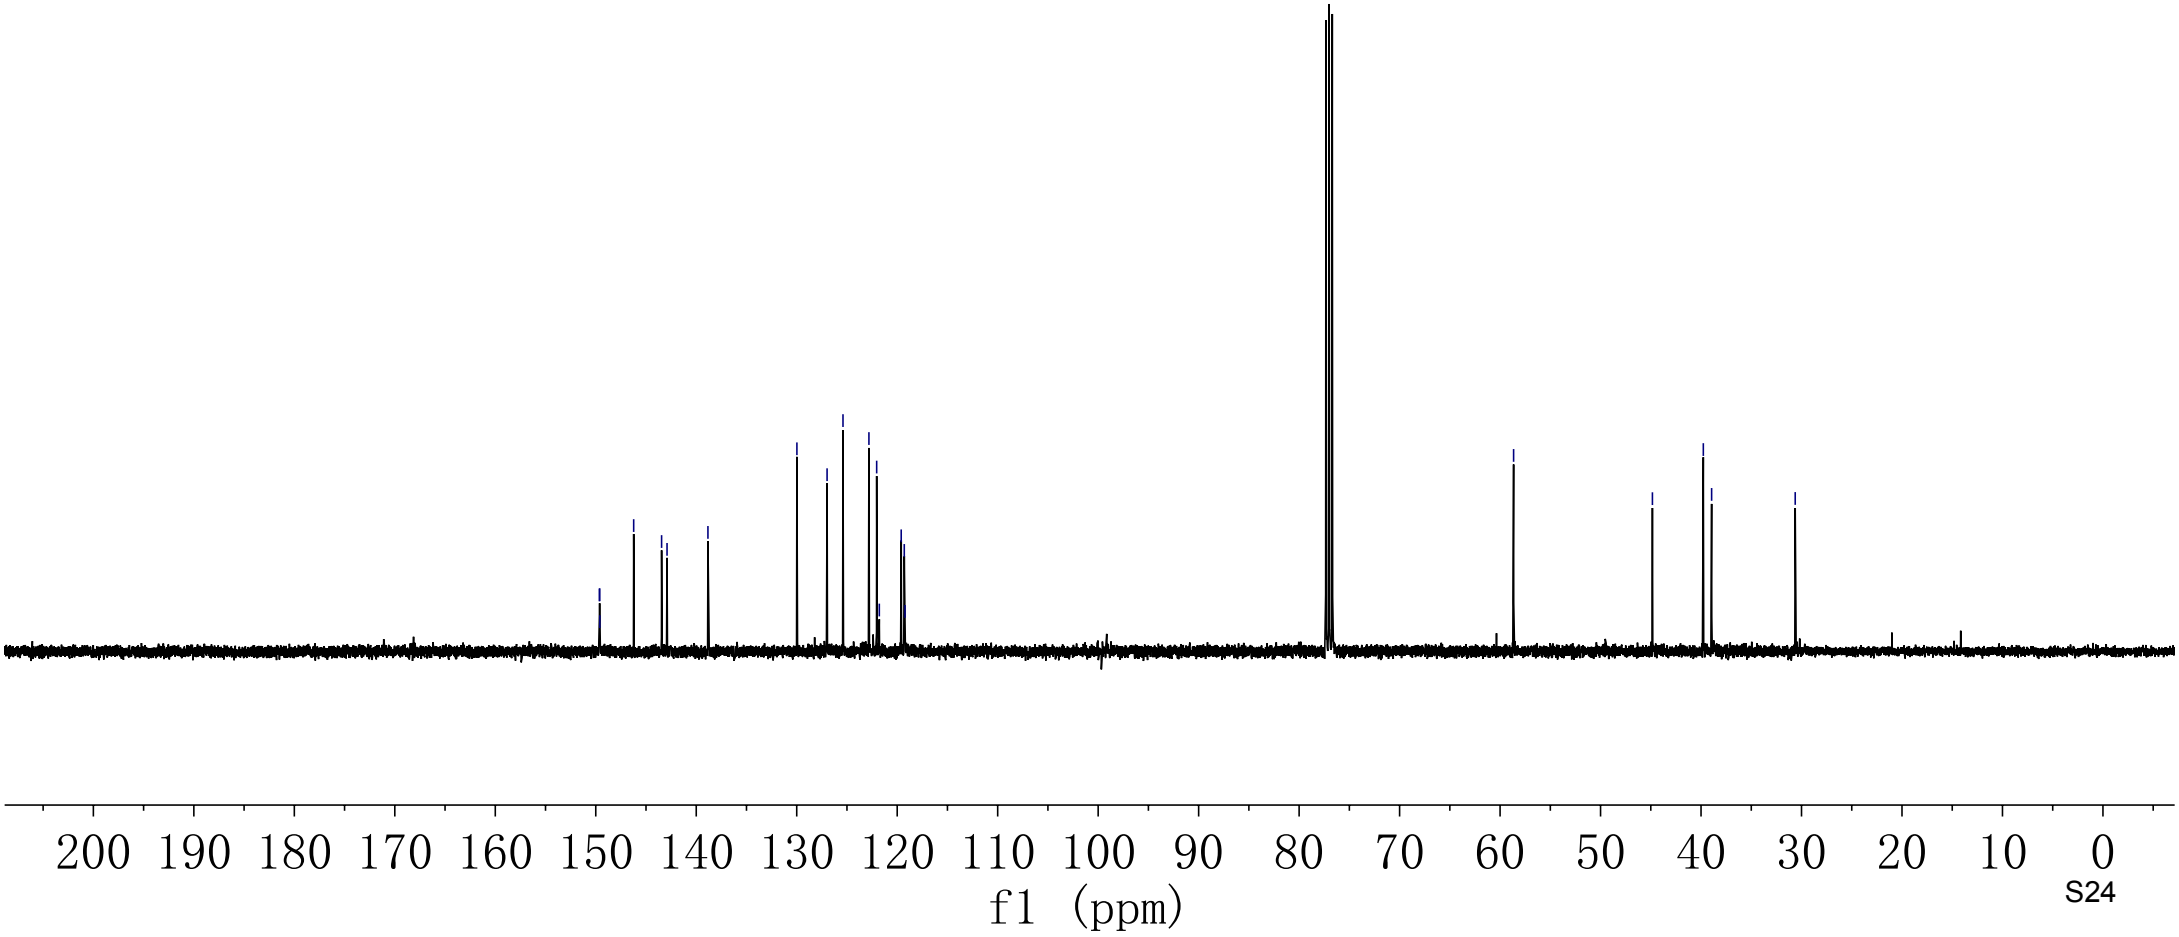



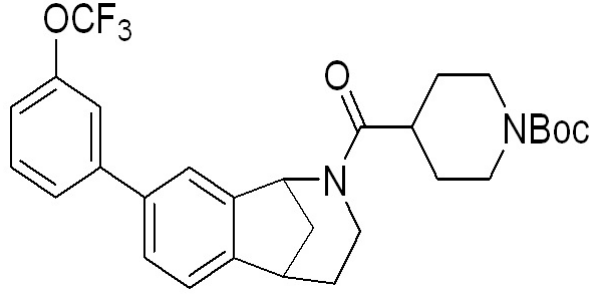

7.495  
7.480  
7.462  
7.446  
7.430  
7.399  
7.341  
7.325  
7.197  
7.181  
4.185  
4.161  
4.125  
4.111  
3.385  
2.782  
2.772  
2.757  
2.747  
2.732  
2.723  
2.326  
2.317  
2.306  
2.292  
2.028  
2.023  
2.015  
2.011  
2.003  
1.999  
1.870  
1.864  
1.846  
1.757  
1.716  
1.708  
1.702  
1.692  
1.683  
1.677  
1.670  
1.456

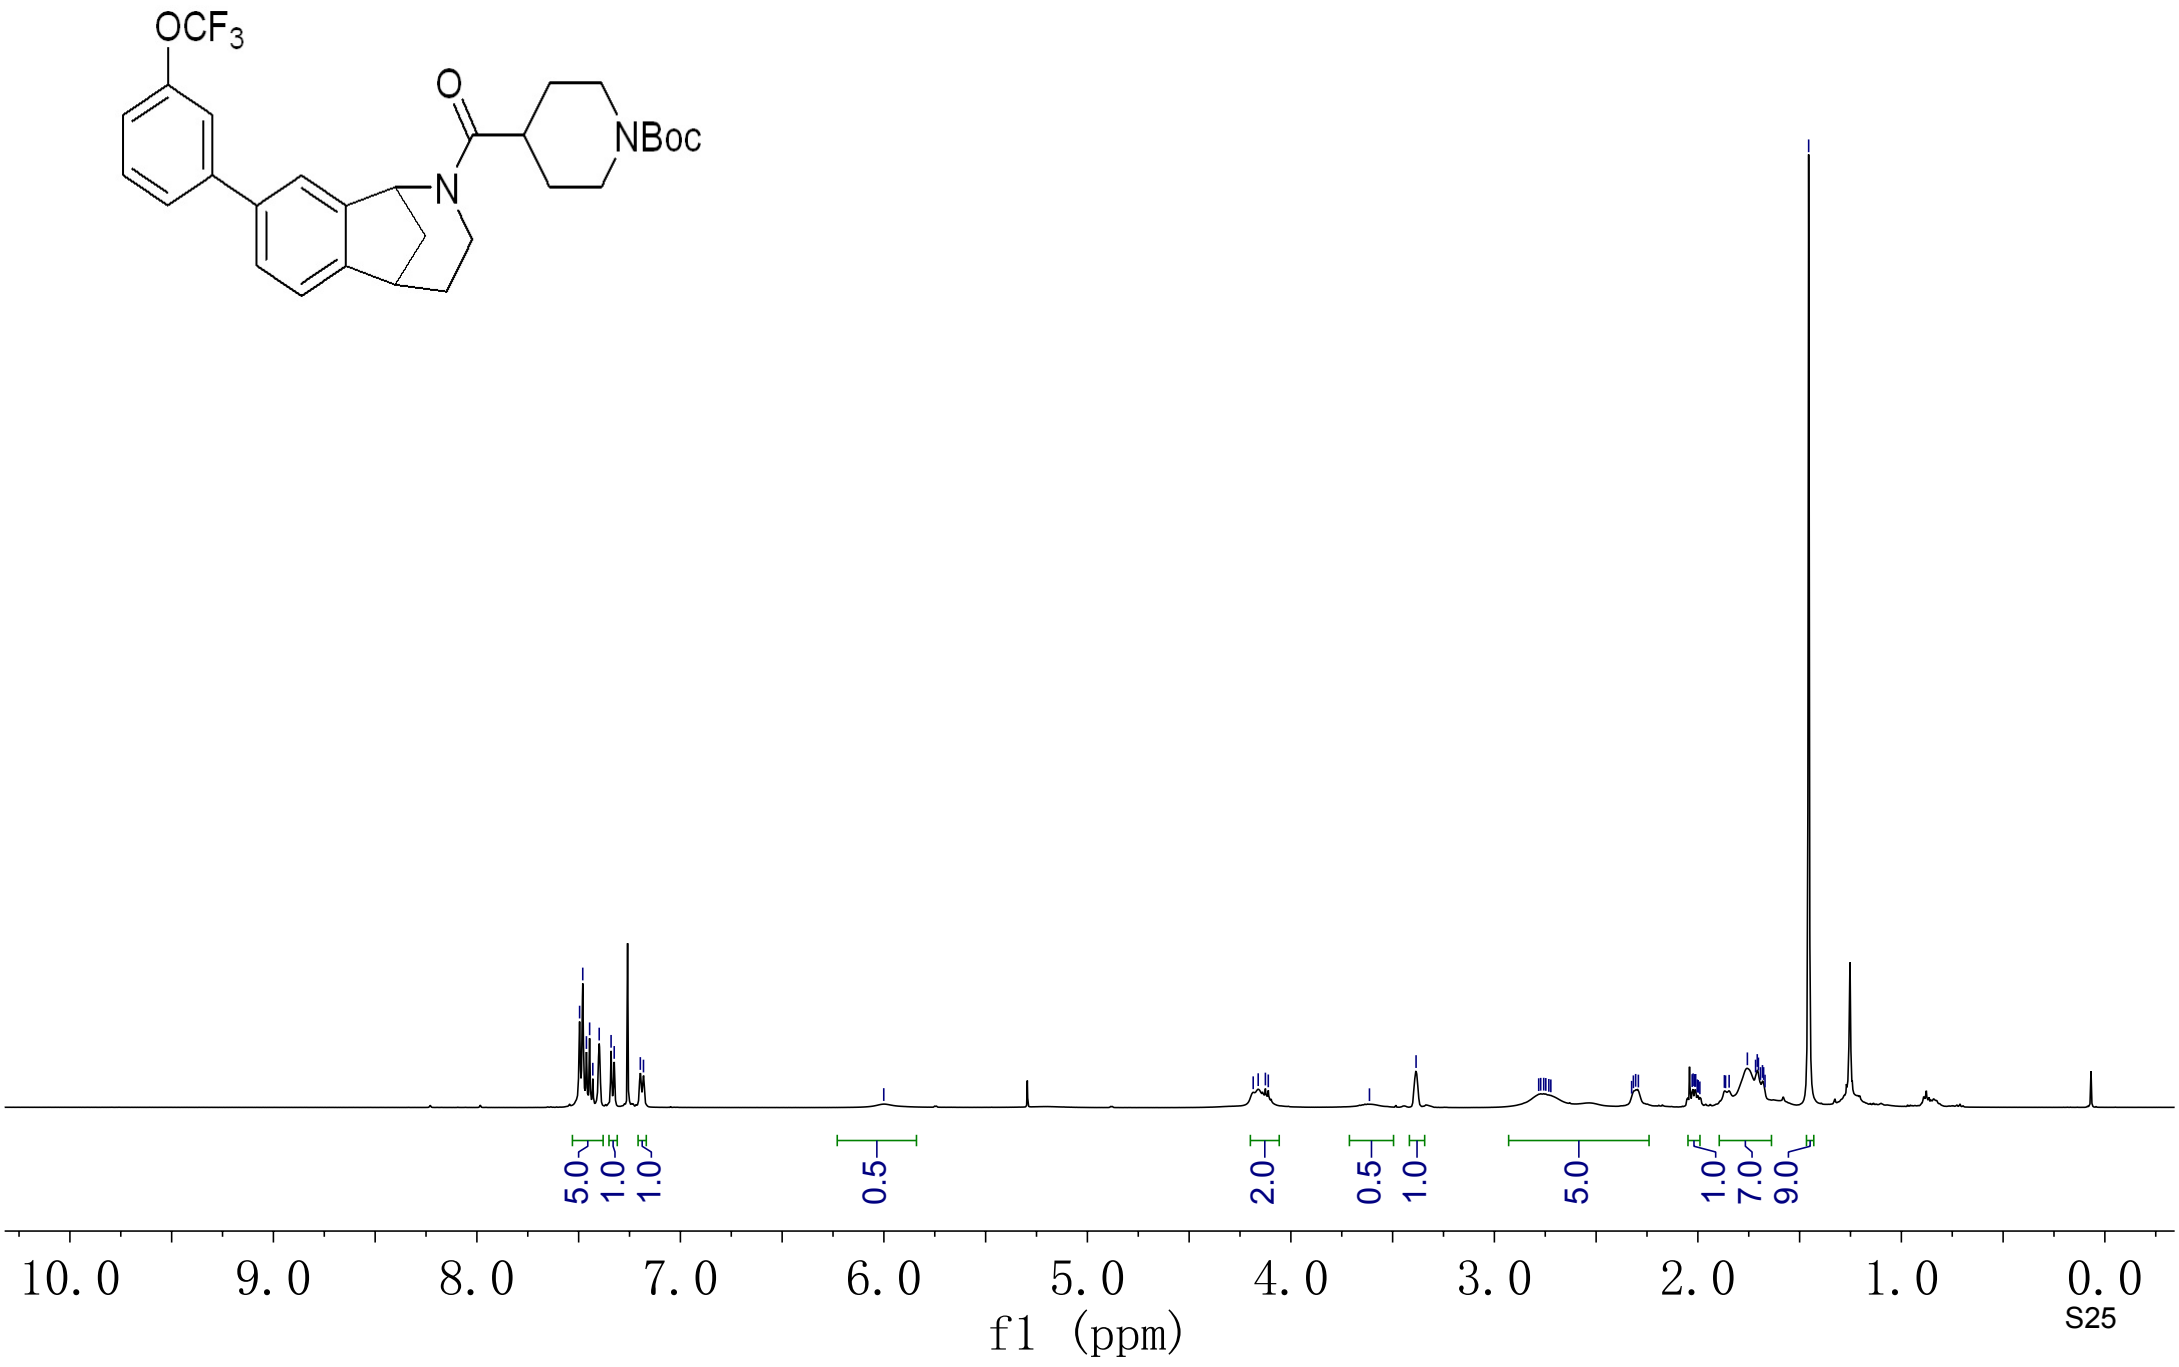

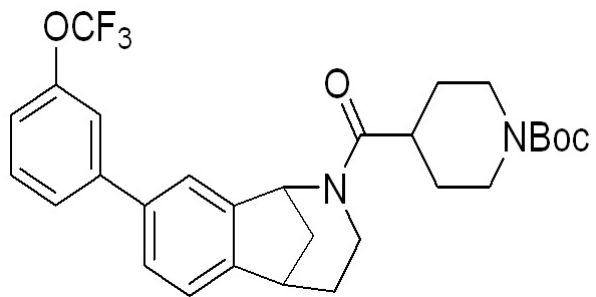

-172.36  
154.69  
149.68  
149.67  
146.46  
143.08  
142.00  
139.16  
130.10  
127.60  
125.40  
123.57  
123.15  
122.61  
121.52  
119.63  
119.53  
119.48  
117.43

-79.56

-54.76  
44.03  
43.27  
39.77  
38.91  
31.04  
29.69  
28.67  
28.43

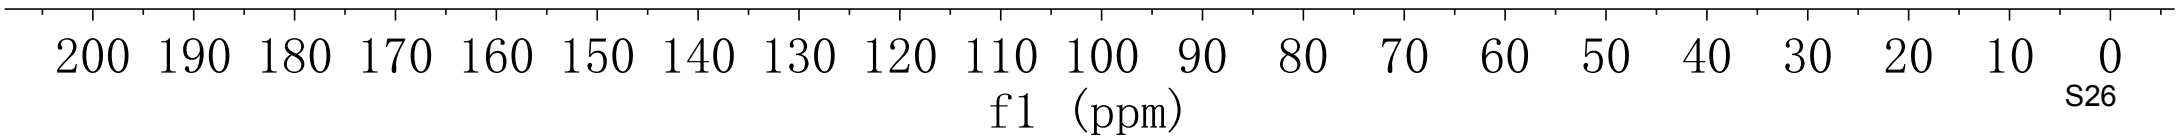

7.511  
7.506  
7.495  
7.486  
7.481  
7.475  
7.467  
7.462  
7.458  
7.447  
7.440  
7.427  
7.407  
7.397  
7.379  
7.341  
7.322  
7.303  
7.260  
7.179  
7.159  
6.001  
5.991  
5.286  
3.376  
3.366  
3.357  
2.930  
2.912  
2.706  
2.693  
2.674  
2.660  
2.255  
2.250  
2.010  
2.001  
1.994  
1.914  
1.887  
1.853  
1.844  
1.830  
1.803  
1.762  
1.751  
1.739  
1.730  
1.703  
1.692  
1.685  
1.675  
1.659

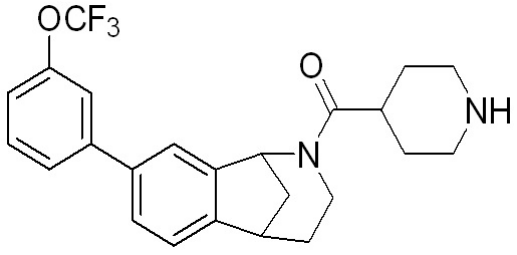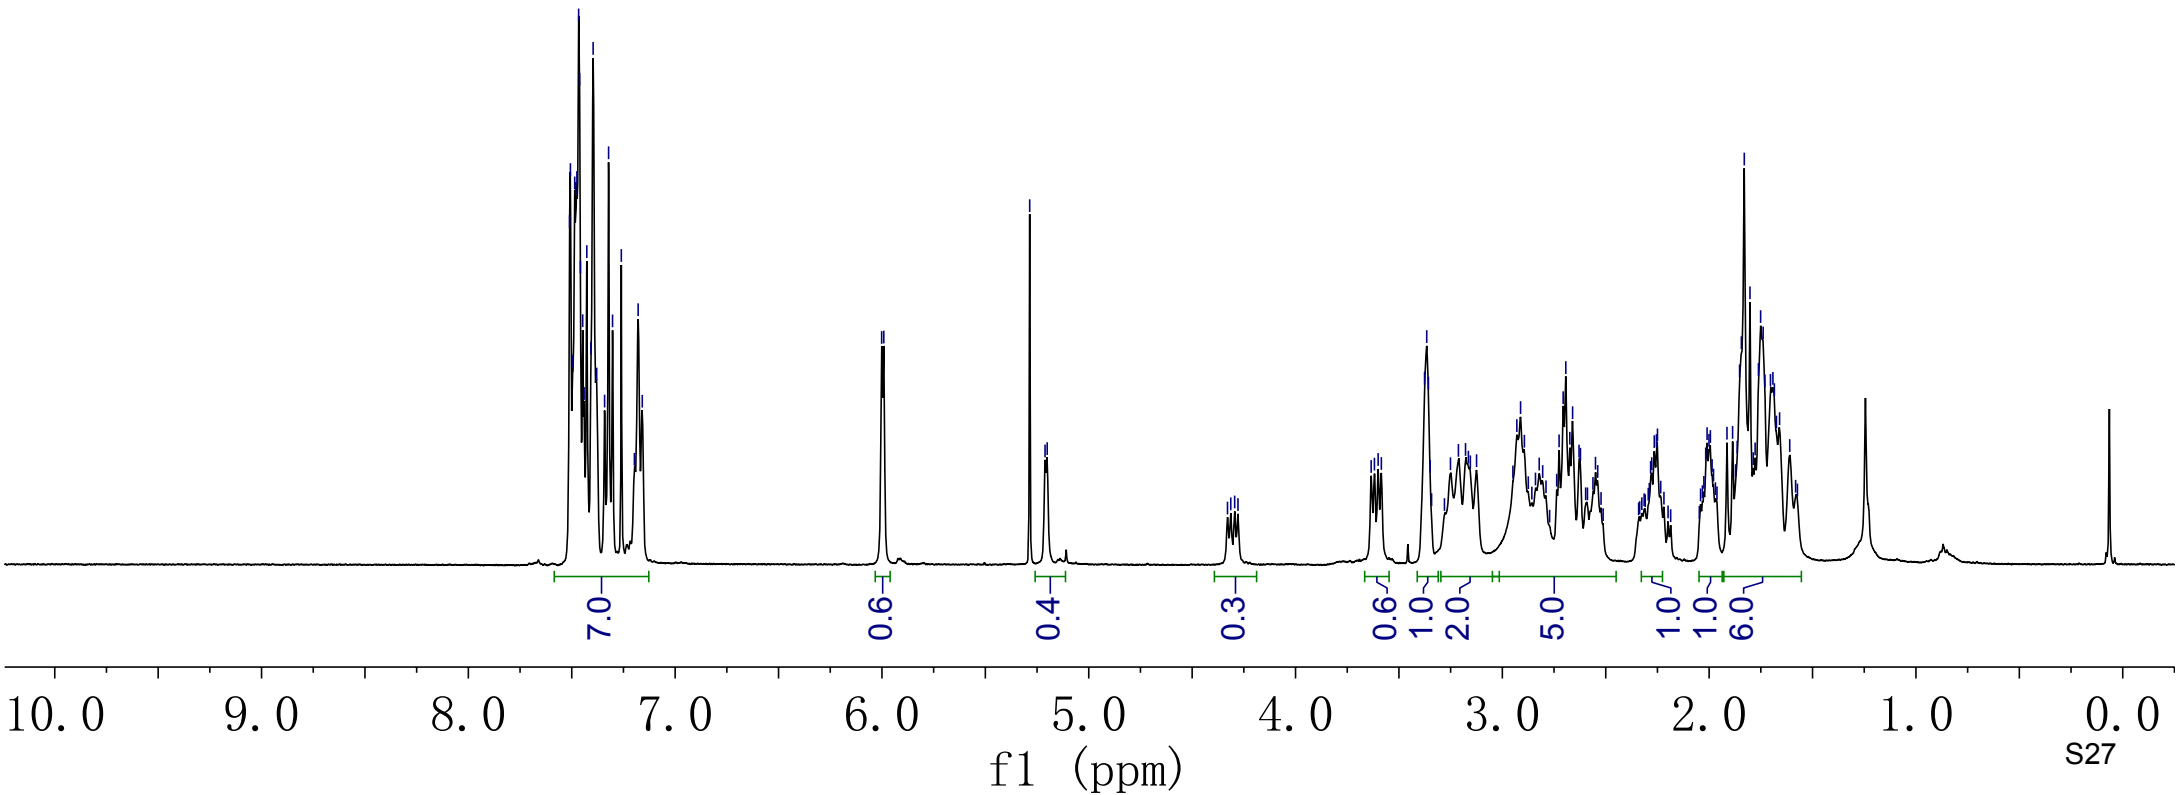

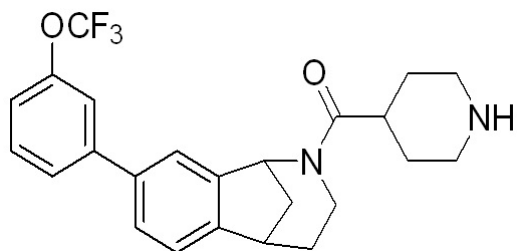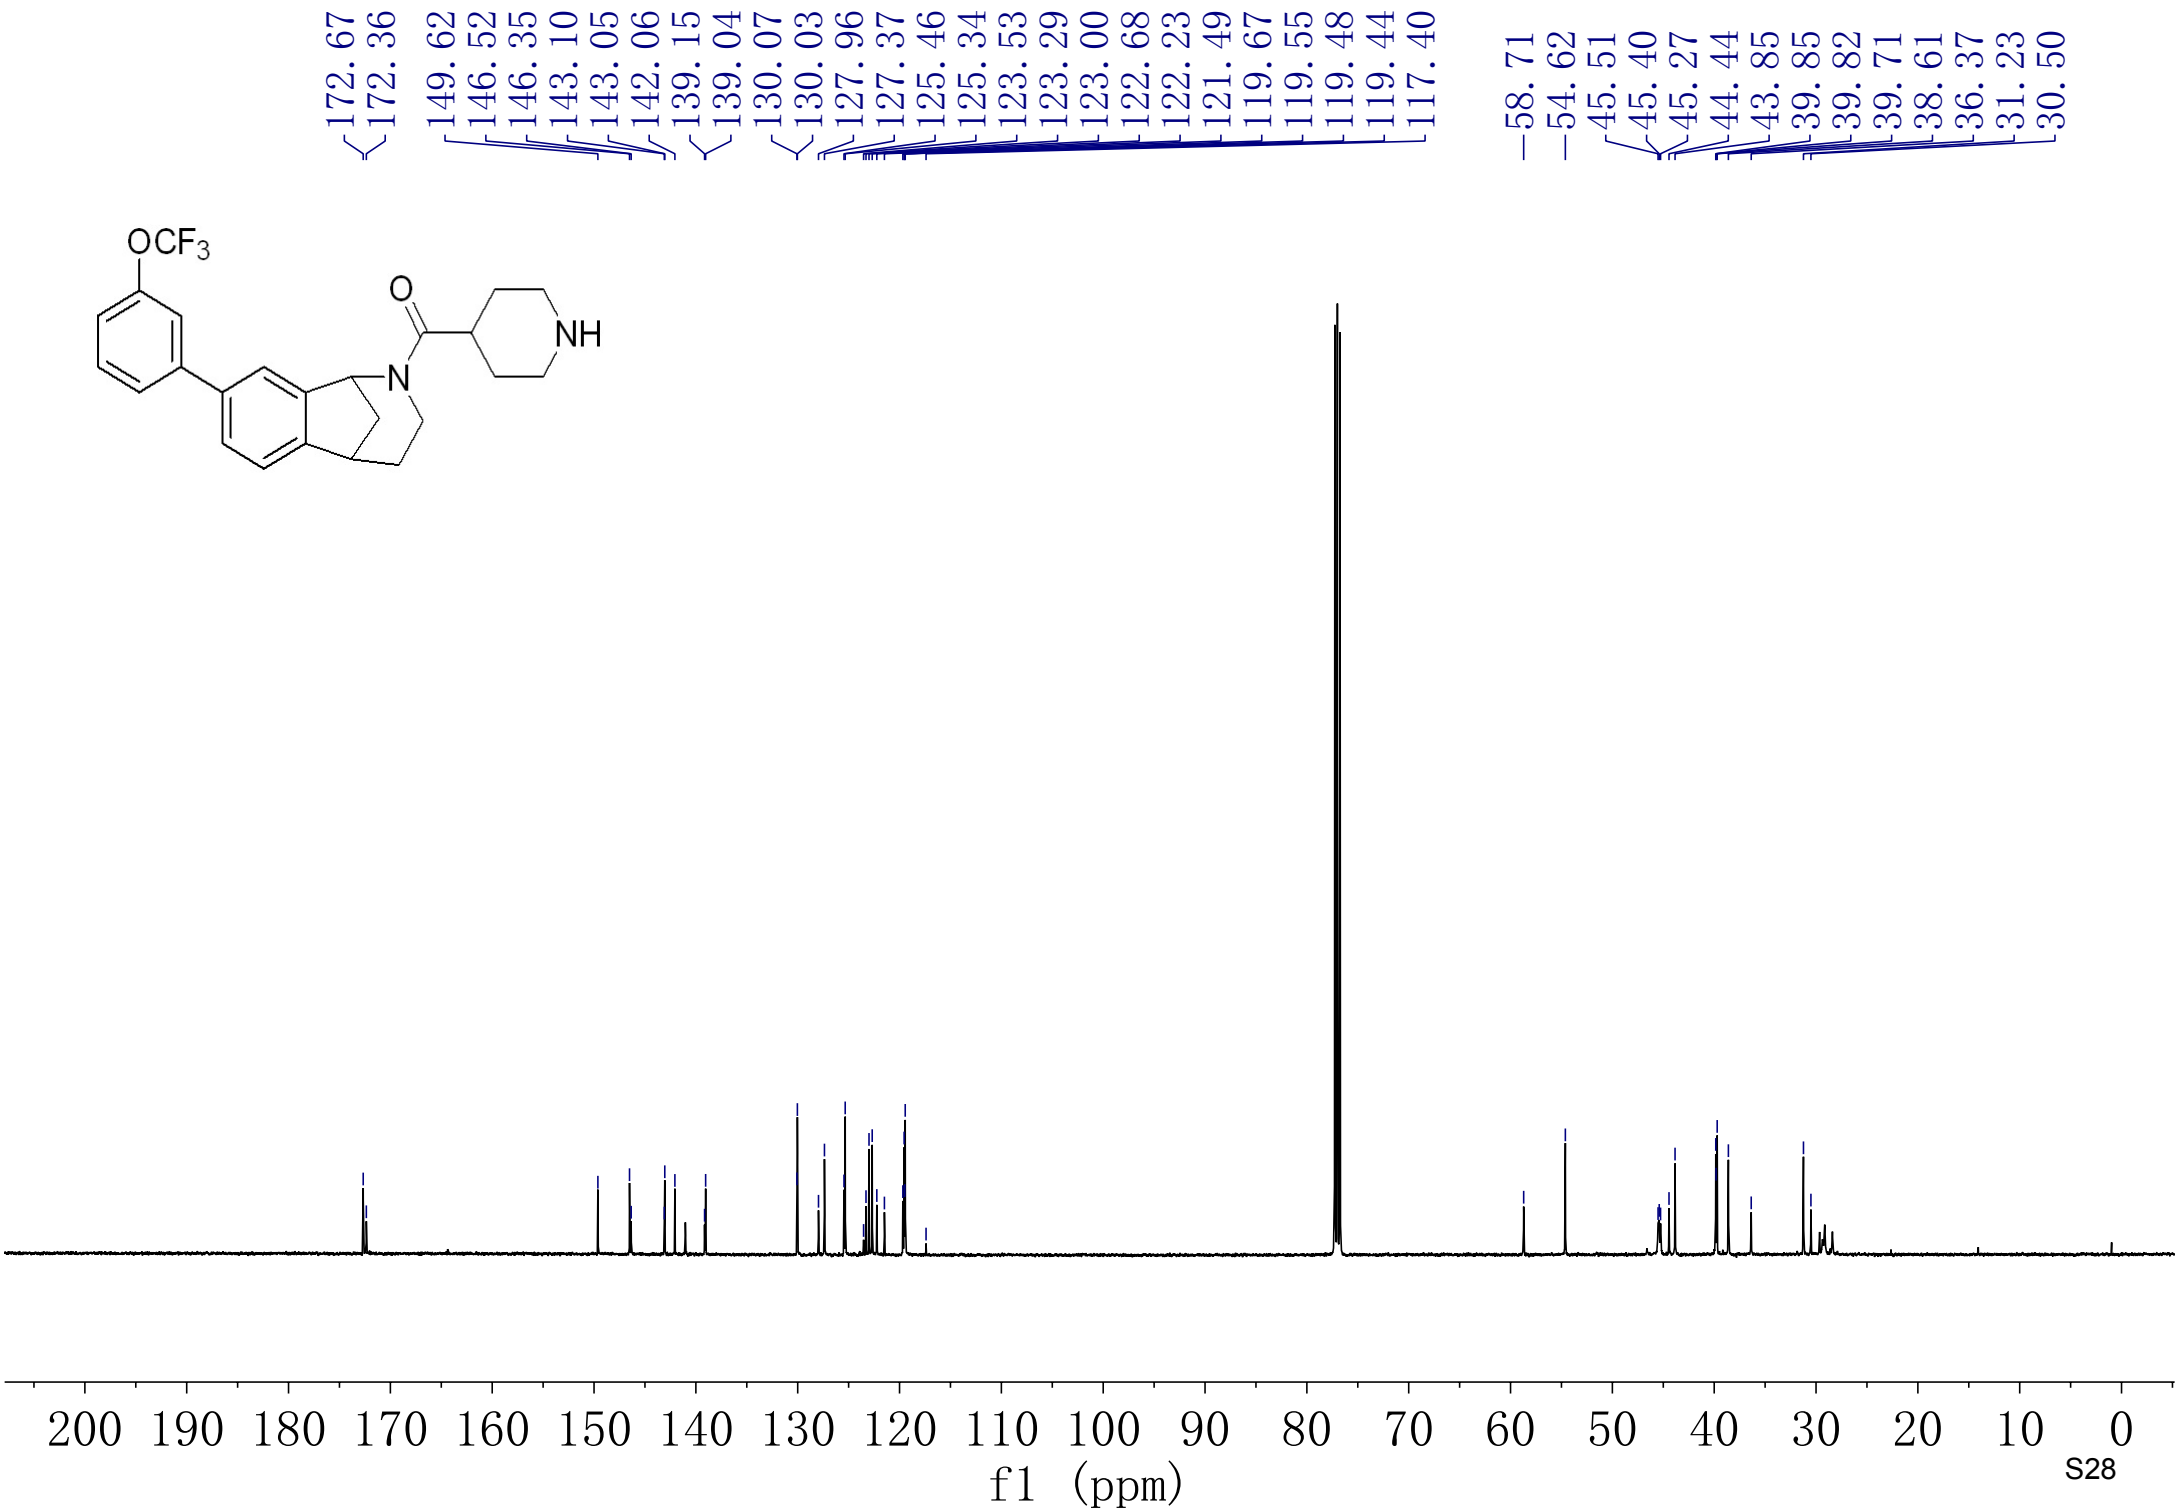

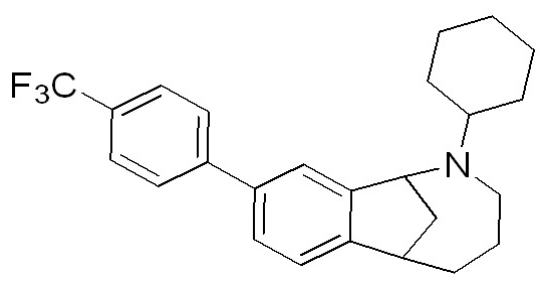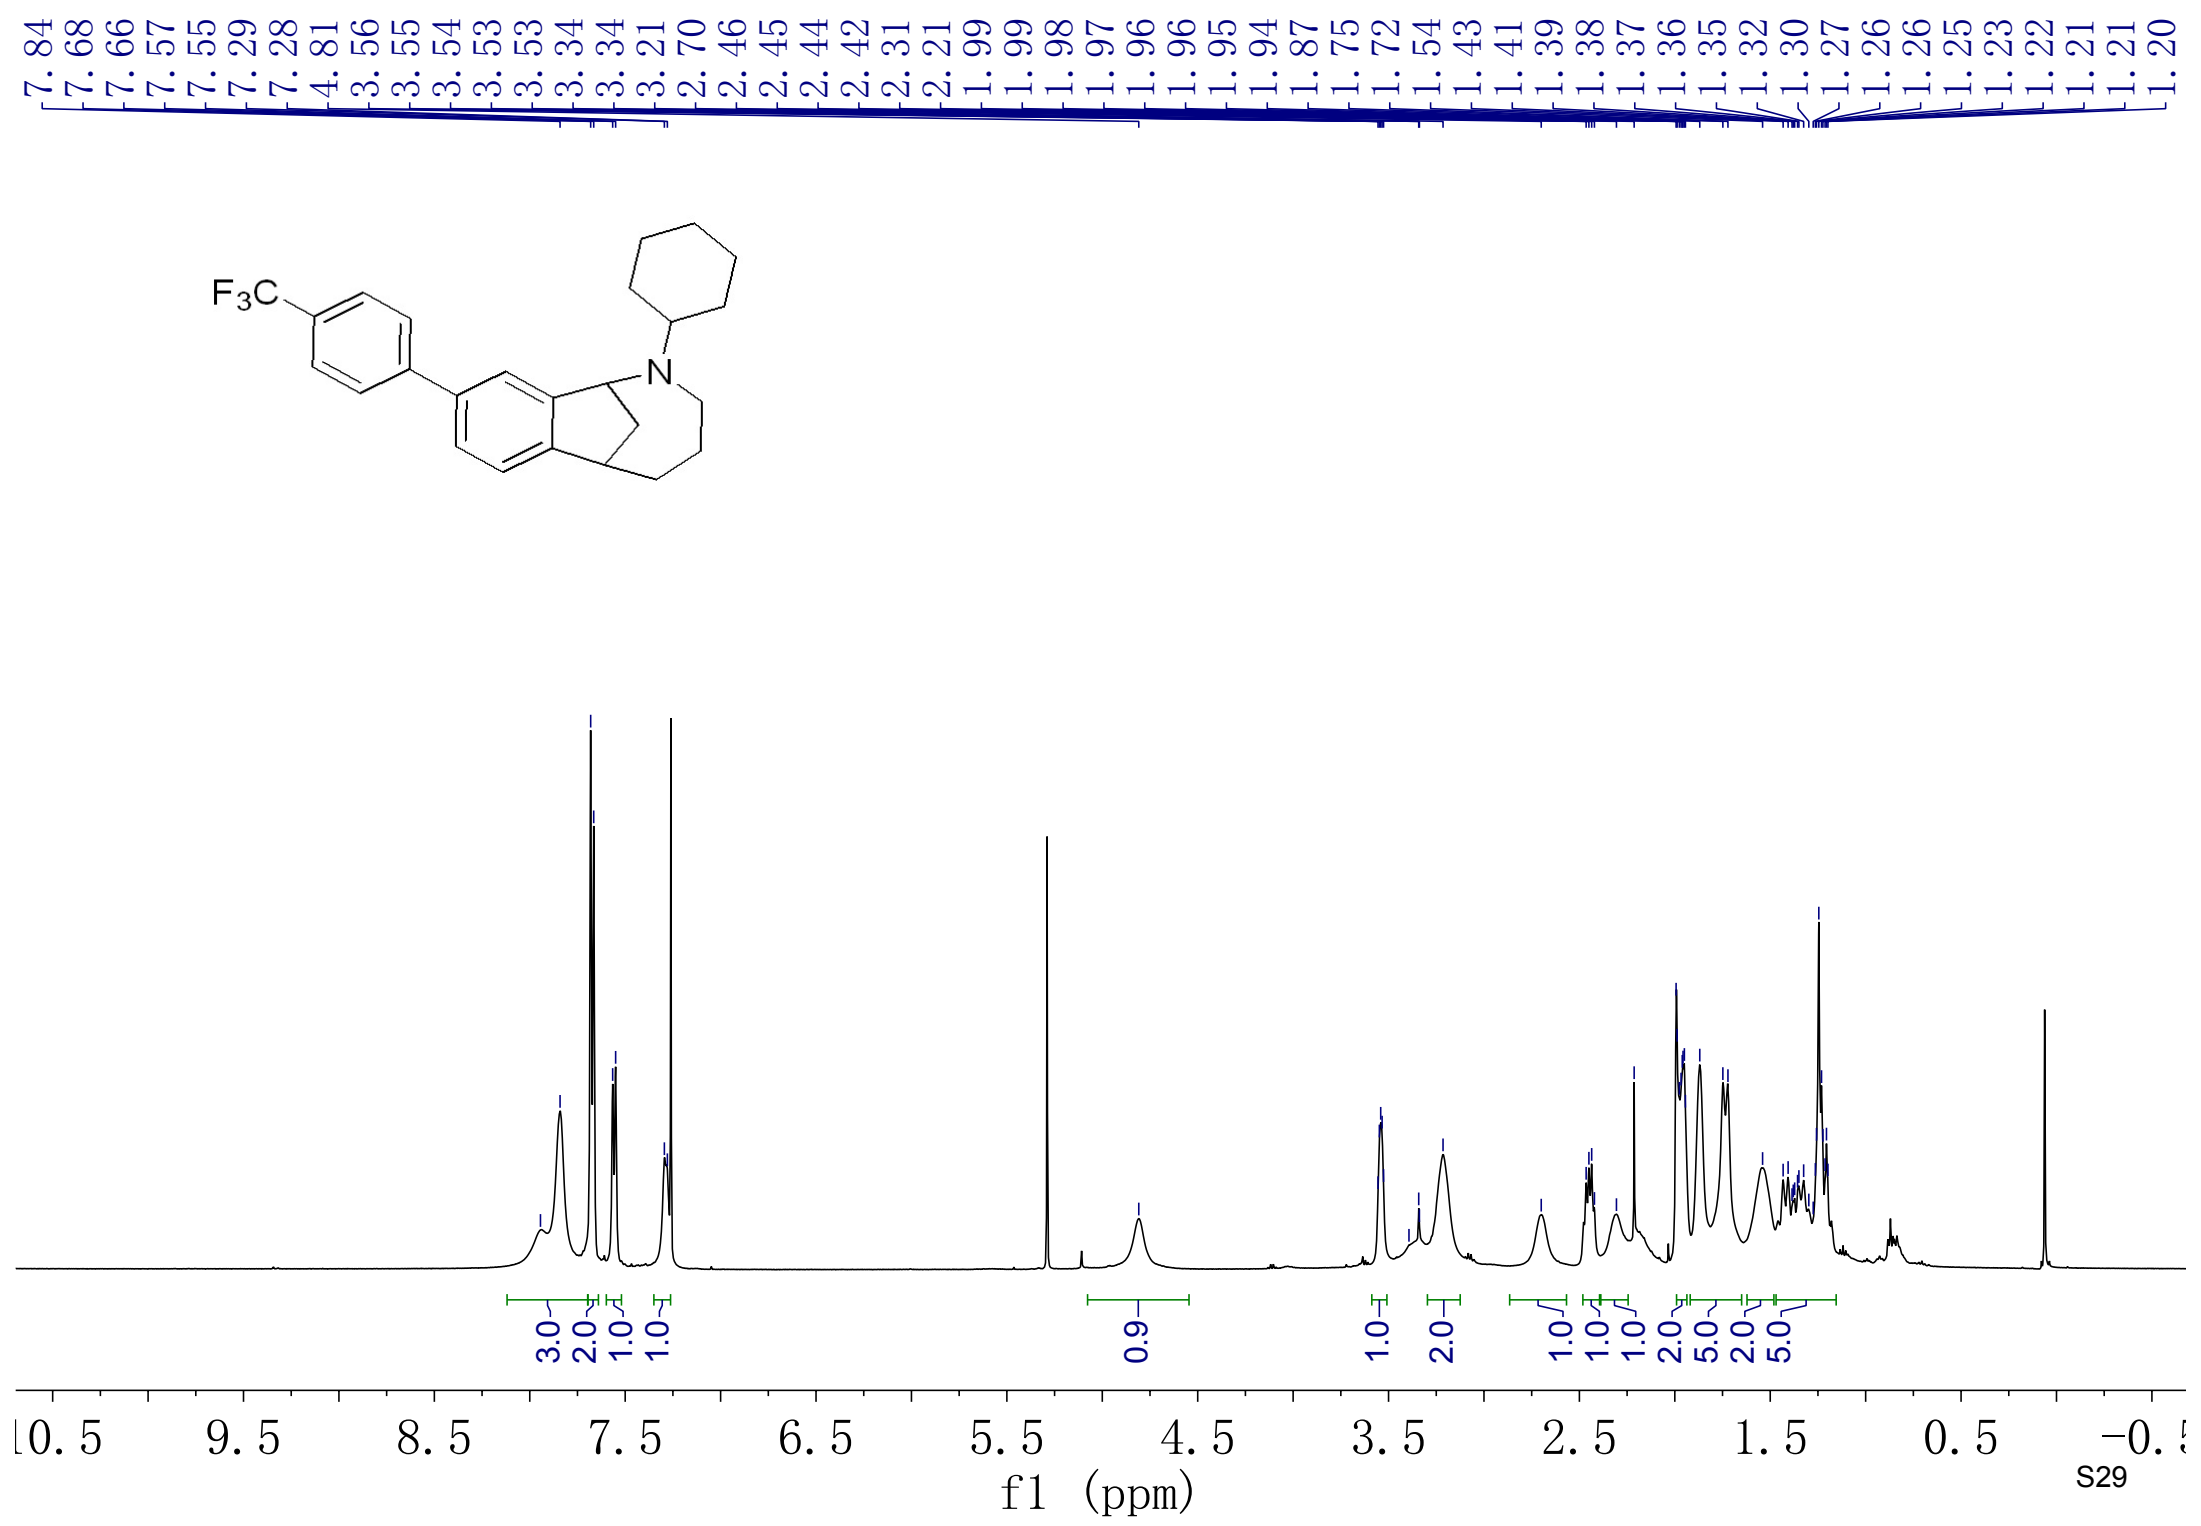

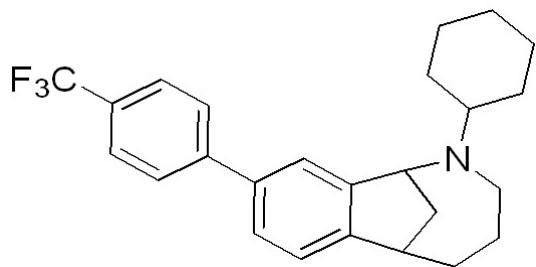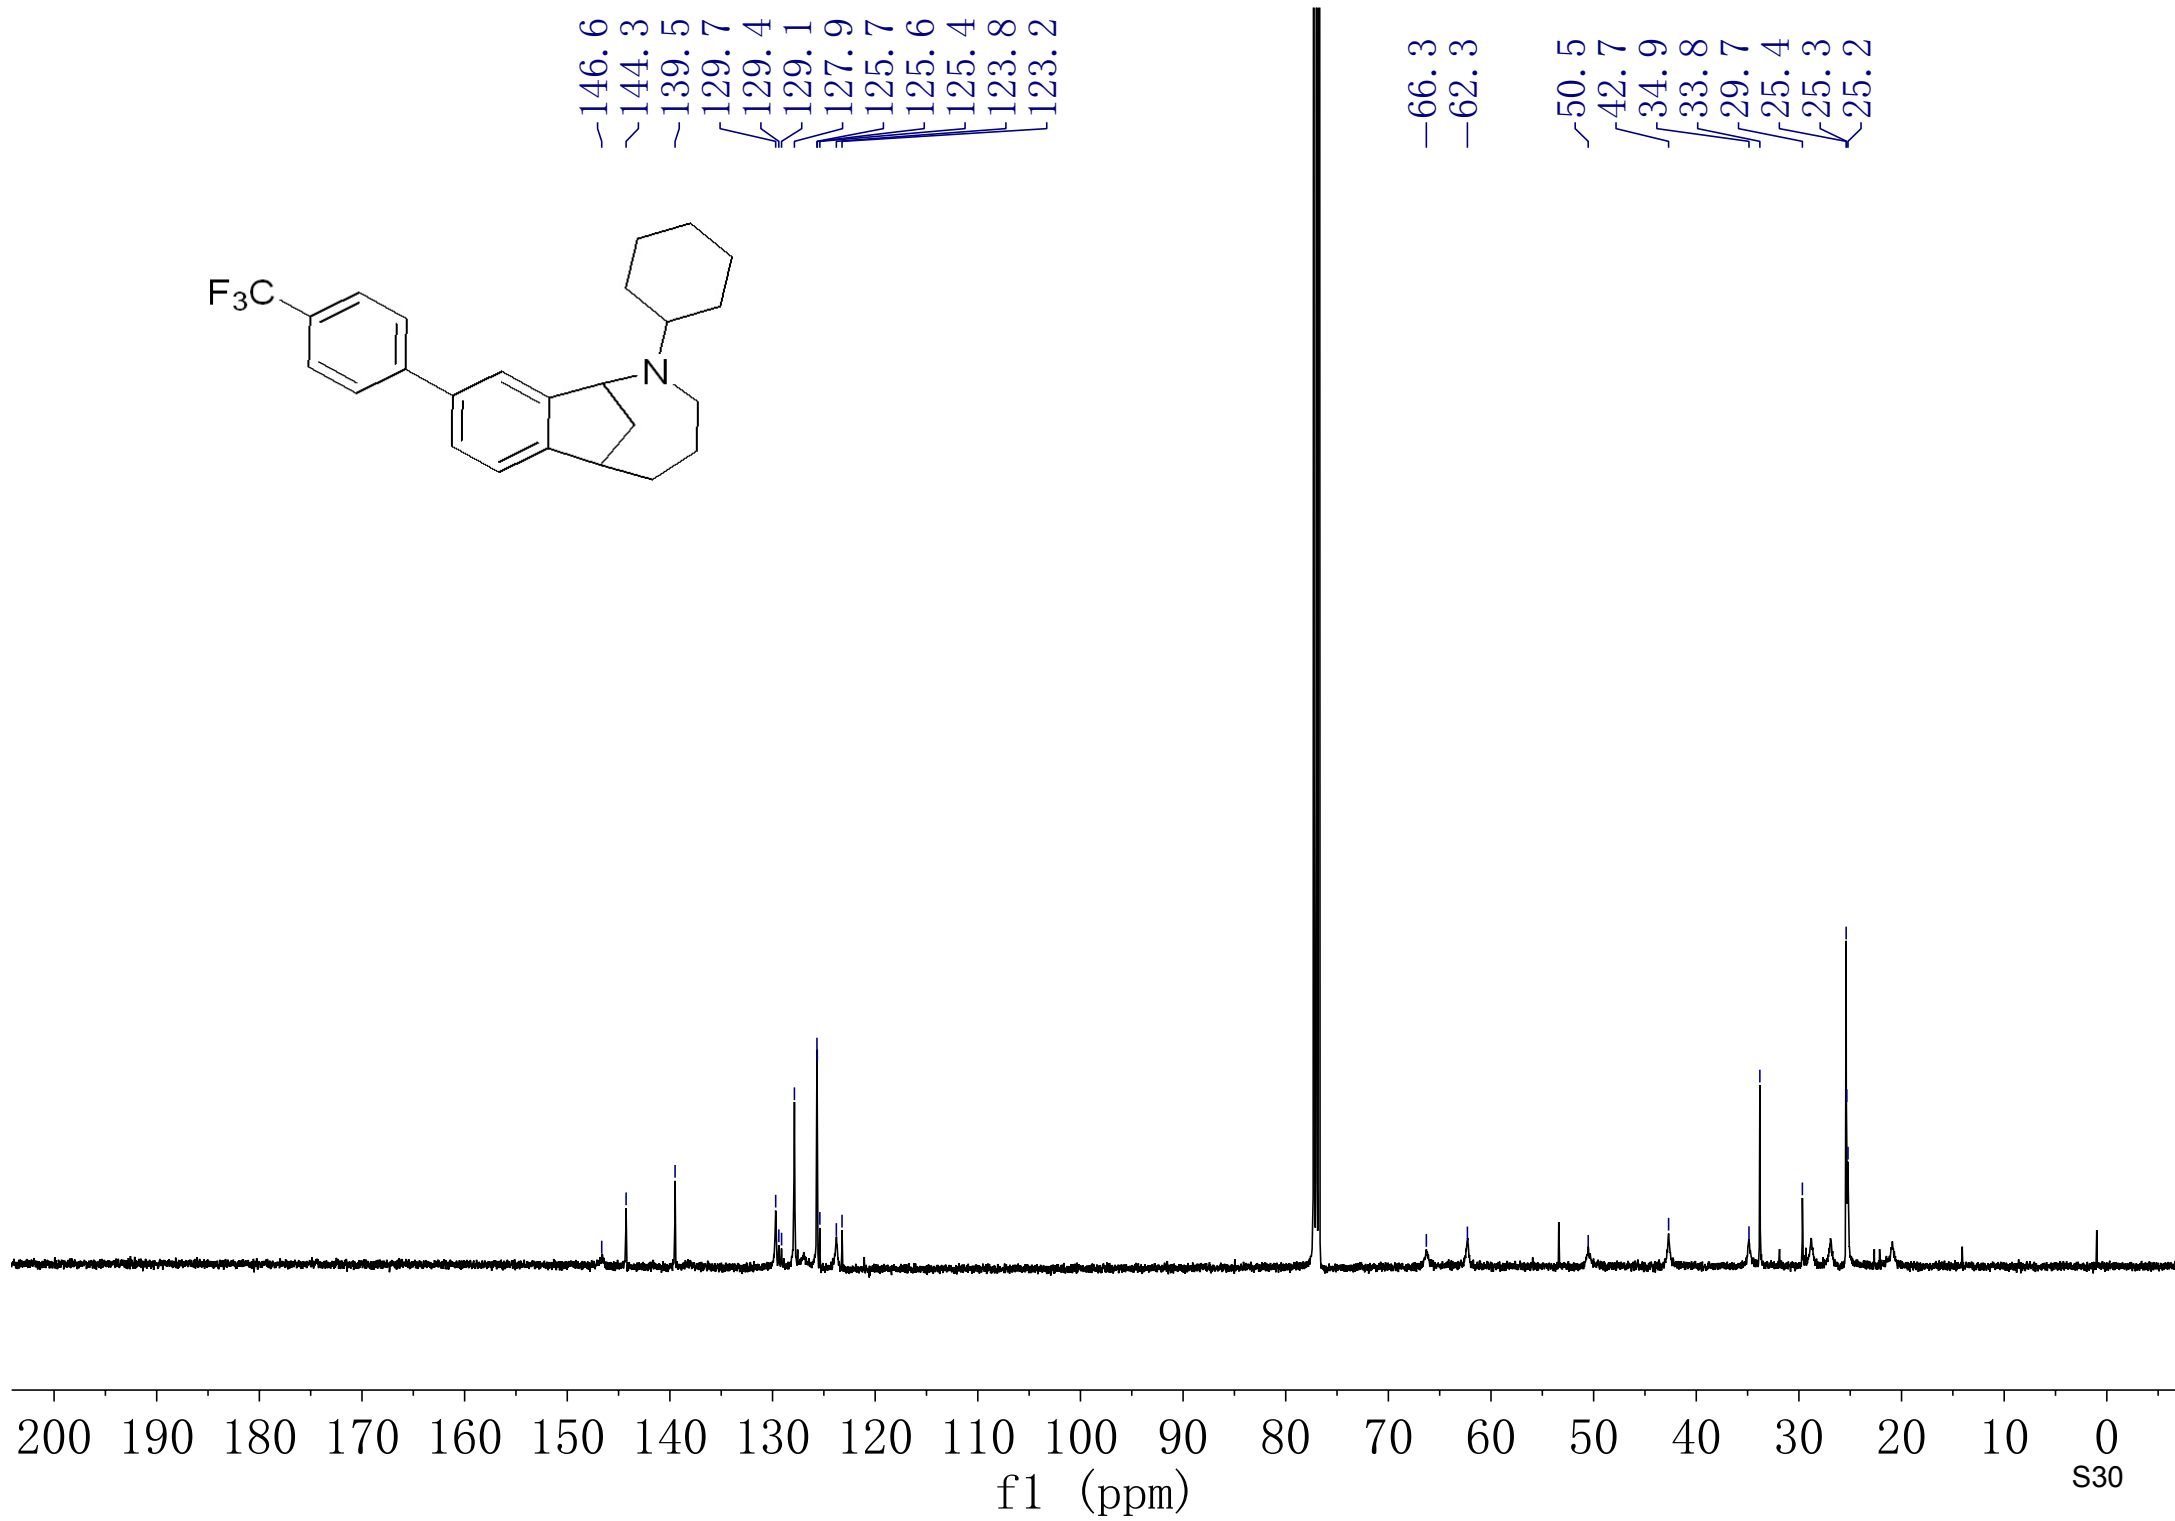

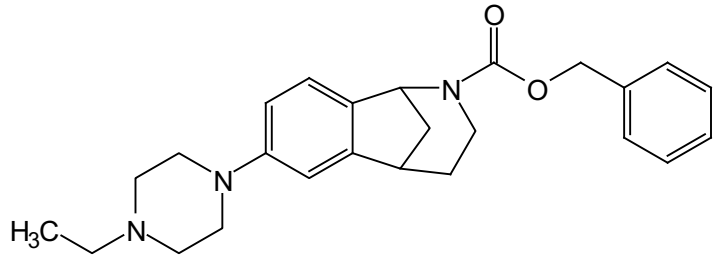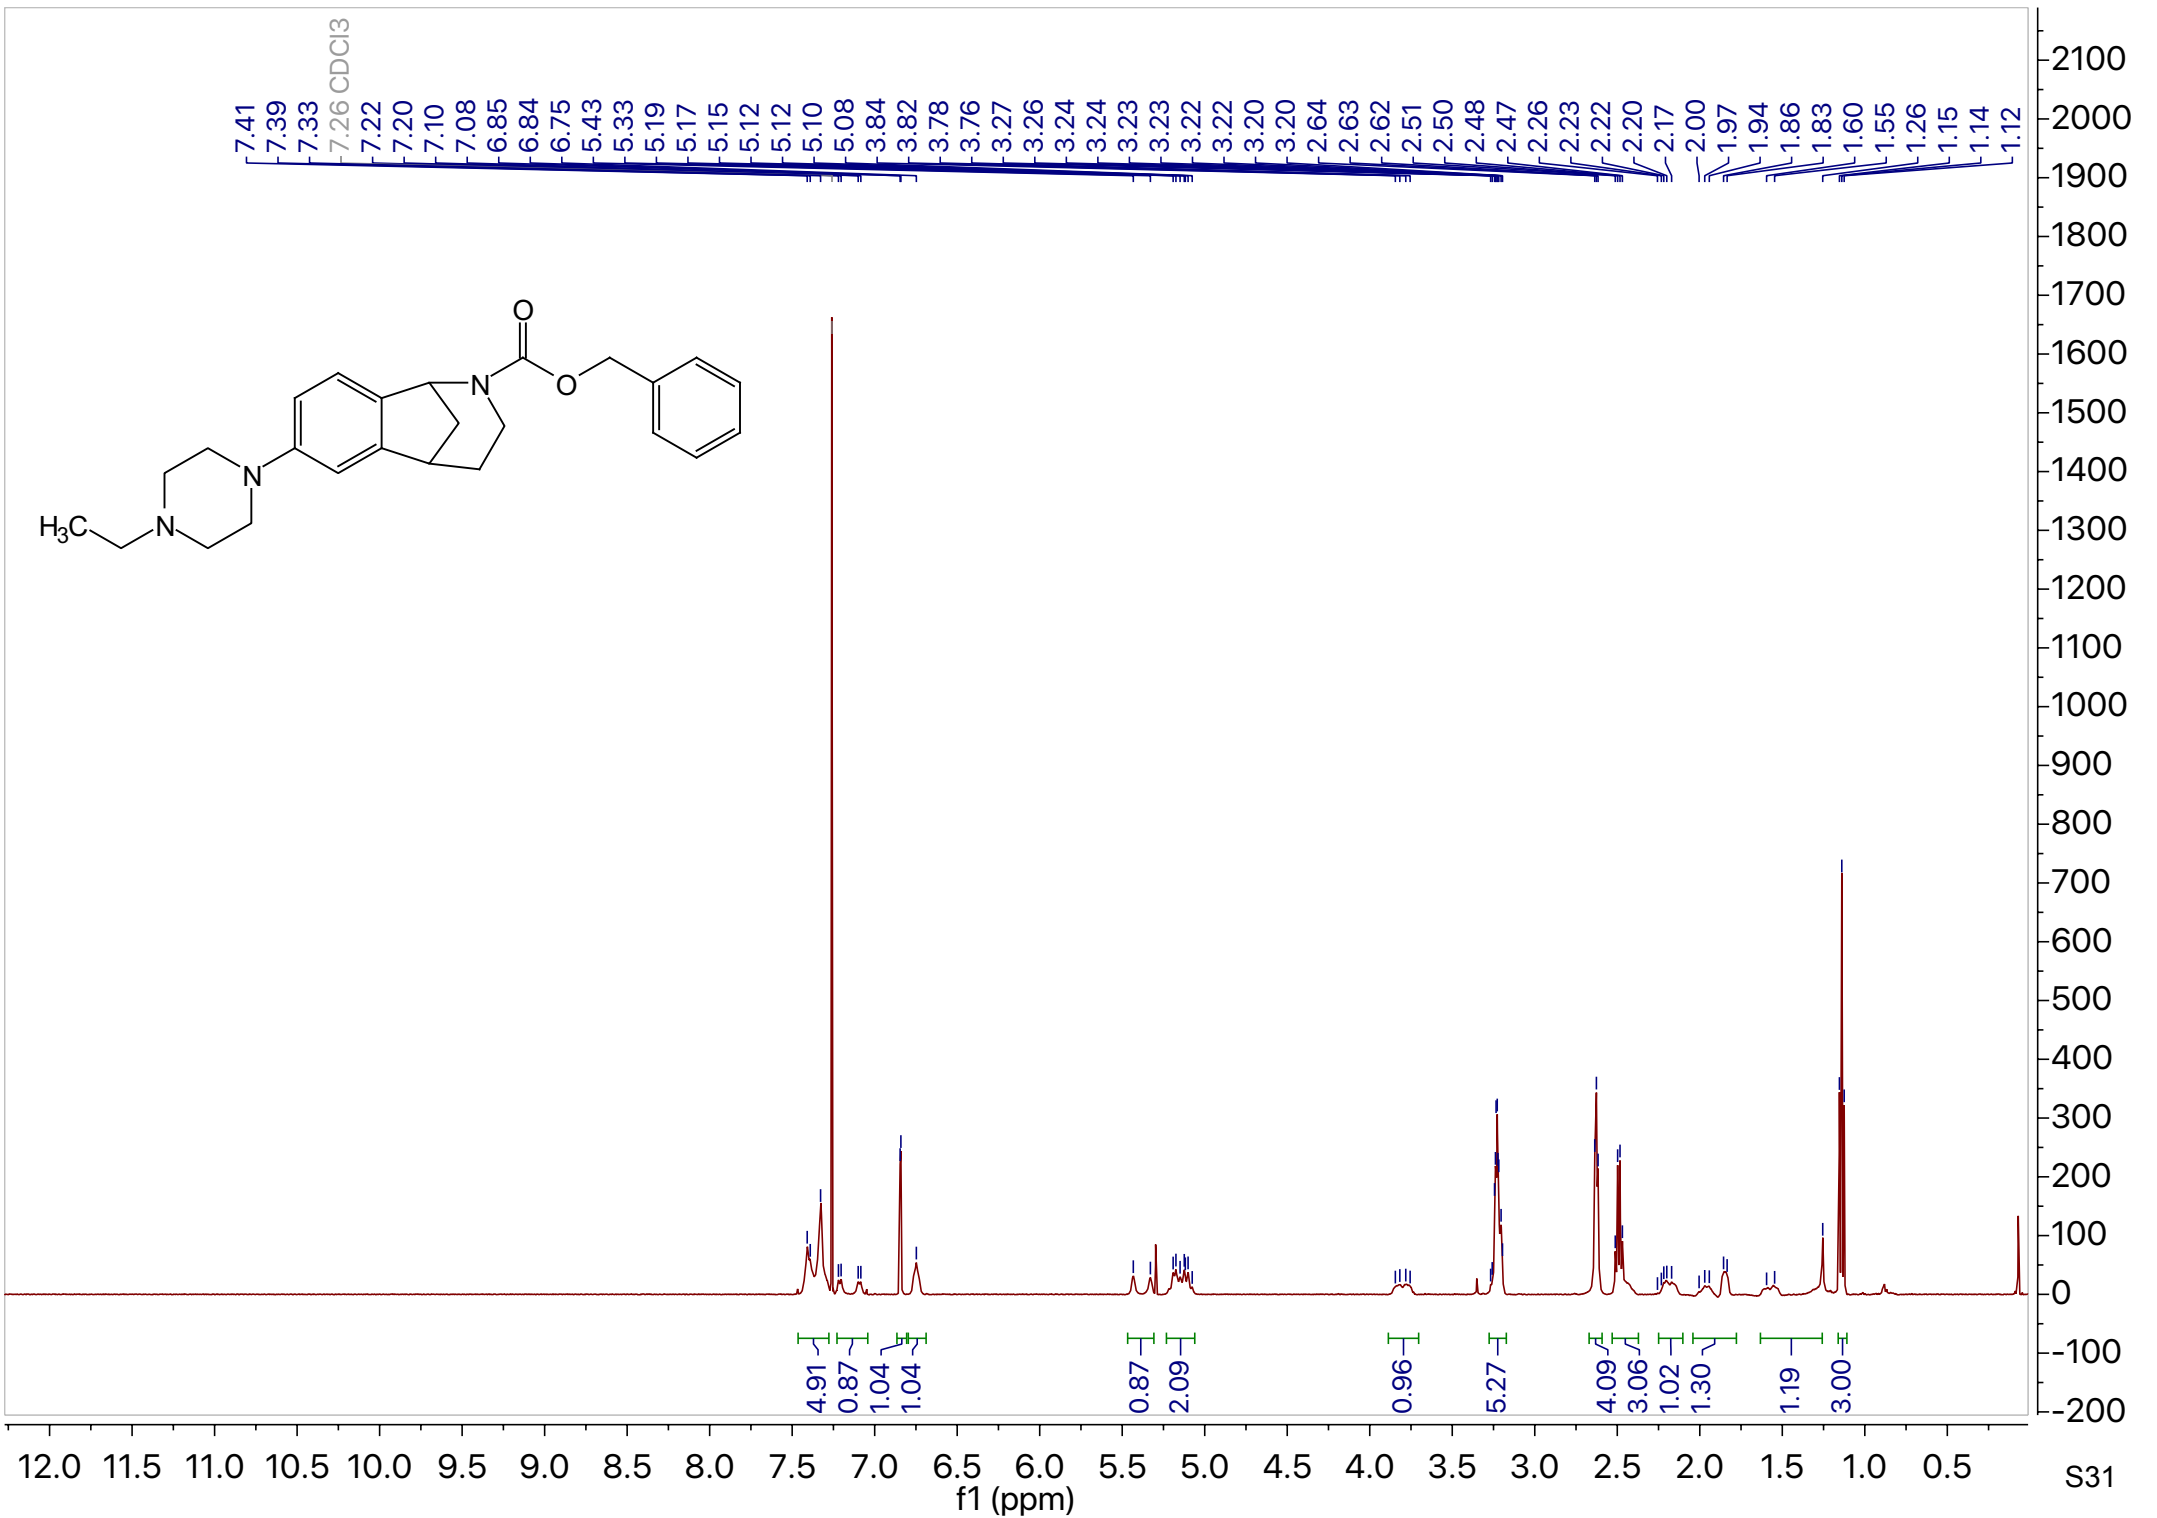

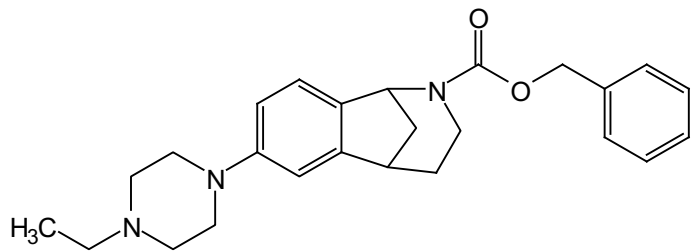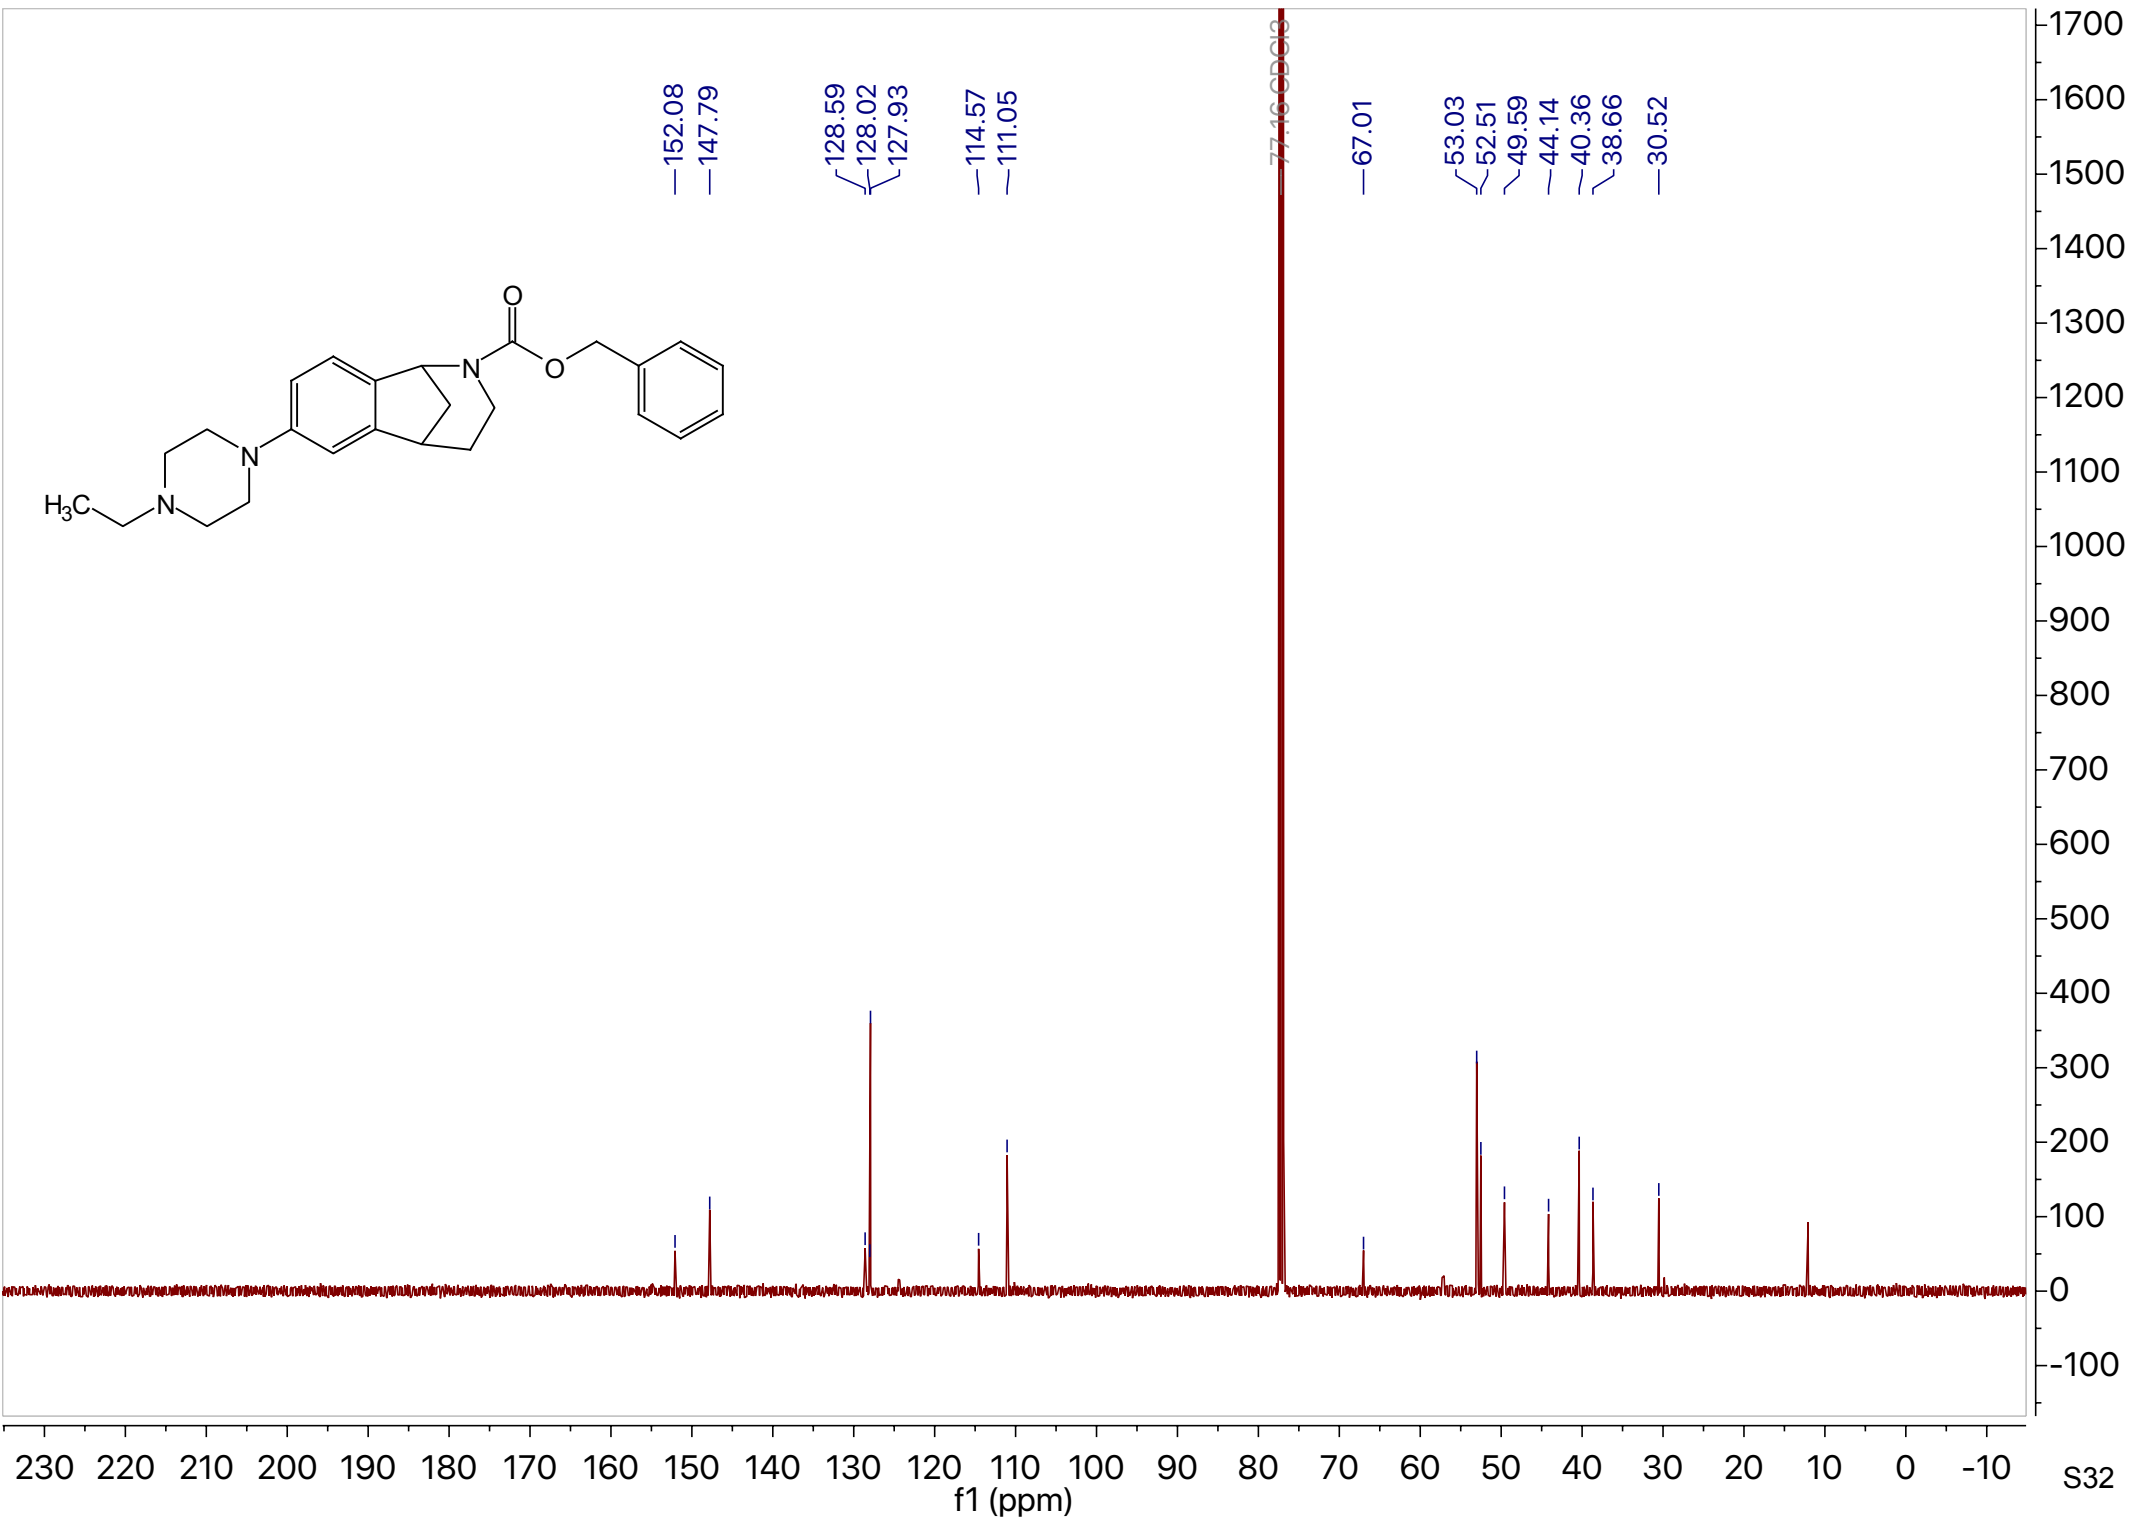

Supplement: NIHMS1838439-supplement-SI.pdf [file NIHMS1838439-supplement-SI.pdf]
